# Supplementary material for: Towards sex identification of Asian Palmyra palm (Borassus flabellifer L.) by DNA fingerprinting, suppression subtractive hybridization and de novo transcriptome sequencing
Source: PeerJ. 2019 Jul 10;7:e7268. doi: 10.7717/peerj.7268 (PMC6626516; doi:10.7717/peerj.7268)
Supplement: Table S3 — References of primers are included. [file peerj-07-7268-s007.xlsx]

## Sheet: Sheet1
Table S3. TE primers
Primer	Forward primer (5'-3')	Ta (°C)	Reference
Dasheng2CT	ATCATGAGTCCTGCTCGGCT	50	Jiang et al. 2002
Dasheng2GA	ATCATGAGTCCTGCTCGGGA	50	Jiang et al. 2002
Dasheng2AT	ATCATGAGTCCTGCTCGGAT	50	Jiang et al. 2002
Dasheng2TC	ATCATGAGTCCTGCTCGGTC	50	Jiang et al. 2002
DashengLTR	TTTAGGTCTCGTGCGCTACC	50	Jiang et al. 2002
Stowaway1st	GAATGACTTACATTGTGAAACGGAG	50	Bureau and Wessler, 1994
Stowaway2nd	GACTTACATTGTGAAACGGAGGGAG	50	Bureau and Wessler, 1994
Mashu1st	ATGGATAGCACCTTACTTTACCATTG	50	Takata et al. 2005
Mashu2nd	CCTTACTTTACCATTGTGGGTGCTT	50	Takata et al. 2005
mPingP1	TGTGCATGAGACACCAGTG	50	Naito et al. 2006
mPingP2	CAGTGAAACCCCCATTGTGAC	50	Naito et al. 2006
