# Supplementary material for: Towards sex identification of Asian Palmyra palm (Borassus flabellifer L.) by DNA fingerprinting, suppression subtractive hybridization and de novo transcriptome sequencing
Source: PeerJ. 2019 Jul 10;7:e7268. doi: 10.7717/peerj.7268 (PMC6626516; doi:10.7717/peerj.7268)
Supplement: Table S5 [file peerj-07-7268-s009.xlsx]

## Sheet: Sheet1
Table S5. ILP primers
Primer	Forward primer (5'-3')	Reverse primer (5'-3')	Ta (°C)
Ts1-1	CGATCTCATCAGAAGGCAAG	AATTGGGTGATCATTTGAAGT	53.9
Ts1-2	TCTACGGTCCGCCTGAATCT	CCGGTCAACAAATGGGAGGT	53.9
Ts1-3	CCATGCCTAACATGGCACTT	AACTCATCGTCGCGCAGC	56
Ts1-4	ATGATACCCCTGACATCATA	AGCAGTTGCAATCACCC	56
Ts1-5	GATTGATCAAGTCTAATCCTTC	AATGGATCCTCCGCTC	56
Ts1-6	AGGCCTCCAACCAATACAG	AGACTTATTCCTCCTATCCTCC	56
Ts1-7	GGGTCCAACCCACCAG	GCCCCTTAGCTCCTTCAA	56
An1-1	GCGTCGTCGCGCTAA	GAAGGGAAGGCGATCTCA	56
An1-2	TCCTGCGTTGCAAGAT	TCCCAGTCCAAGTCAAG	52
An1-3	GAGCAACGAGAGGTGCCTCAA	CAGCCCACATGTGCTCGAA	56
An1-4	CCTTGGAATCTCCCGGTAT	CTAGAATTCCTTGCCCAACAA	56
An1-5	TGTGGATGACACGGC	TCCCAGTGACTGCTTG	52
An1-6	GCGGATGACGTTTGGATT	GGCAAGCTCCAGATACAC	56
An1-7	CAGGCACTCCATCAGGT	CGGCTGCCAGAAAATAGG	56
Adh1-1	GACCAGACGCTGCTACA	GCATTGGAAATGTTTCCGTC	56
Adh1-2	GTCATTGTGTGCGTTATGTA	CGCTCTCAAGTGCCAT	56
Ids1-1	GCAAGTTAAGAAGAGCAGAAG	ATCGCAGCTCGATCATA	56
Ids1-2	GAGTTGACGCTGACATCAAT	GGTCACCCCTCTGTATTTTG	56
Ids1-3	CGCATGGGACAATTCCTT	GGGCTCAAAGTTGGTAAC	56
Ids1-4	AAGGAGAGTTGCTTACTGAG	GAATTGGATGCCCATTGA	56
Ipt-1	GTCGCGTCTGGCGAT	TCAATGGTGCCCAGGAG	56
Ipt-2	CGTCCGTGGAATTCACTT	GGATCCTGTTTGCCGC	56
Glossy15-1	TCGAGAAGTTCCCAGTACC	CCCCACGAAACTTGATCG	56
Glossy15-2	TGGATGATTATGAGGAGGATCT	CGTCTAAGTACATGGACAAAT	56
Glossy15-3	TTTAGGGGTGTGACCTTGCACAAA	TCAGTGTTGAAGAGGCCCAGG	56
Glossy15-4	GGCTGCAATCAAGTGTCAT	AAAGGTCAAGATTGTGCTCAG	56
D1-1	TAAGCTCATGTGGTCGGAG	GCATCAGCGTTATCAACC	56
D2-1	TCTTTCCCAAGATTGATGAGTTC	TTTTCAATGCTAGCTATTTGCTTC	56
D2-2	CTTGTTCTTGGTACCCTTTC	GAGGGAATCAAGCATGTC	56
D2-3	CTTCGATGATGGCTGTCAAA	GCATCCTCTGCTGACTTC	56
D2-4	AAGTCCTTGAGTTTCACTCG	ACAACTGTGGCAATCCTTAG	56
D2-5	GGAAAACAACCCAAGATGTG	CCTTGTGTAAACATAAATTCTCCA	56
D2-6	CCCATTTTTGTATCCTGAACC	CCTCCTCCACCAAACATCAT	56
D2-7	GACAGCAGAAATCGCAACATT	CATTGGGAGCTTCAACTCTTG	56
D3-1	TTTTGATGGATGACGACCTG	AATCCAGGGATGTTAATGGC	58.1
D3-2	CCATTAACATCCCTGGATTTGC	AAGATTCATGACCAGCATTGAG	56
D3-3	ATGTGGGCCACTGTGTTTCT	ACTTCTGTACCAAGTCTGAACTC	56
CS-ACS1-1	AGGAATTAGCAACGCATCTC	GAAGATCCTTATGATGCTGTCA	56
CS-ACS2-1	CTGGGTGTTGCTTCAAATAGTTC	CCTTCAGGAGTCATTCAGATGGG	56
CS-ACS2-2	AATGCGGTCAGGGTCAAAT	GCCTTGTTTCAAGACTACCAT	56
CS-ACS2-3	GACTGGGATTATGTTGACTCC	GCGTTGCTAATTCCTACTCC	56
