# Supplementary material for: Towards sex identification of Asian Palmyra palm (Borassus flabellifer L.) by DNA fingerprinting, suppression subtractive hybridization and de novo transcriptome sequencing
Source: PeerJ. 2019 Jul 10;7:e7268. doi: 10.7717/peerj.7268 (PMC6626516; doi:10.7717/peerj.7268)
Supplement: Table S7 — References of primers are included. [file peerj-07-7268-s011.xlsx]

## Sheet: Sheet1
Table S7. SSR primers from date palm
Primer	Forward primer (5'-3')	Reverse primer (5'-3')	Ta (ºC)	Reference
PDAG1001	TGCCGAGTGGTTTAATTGTG	TGAAGCAGAGAATCCAACAGAG	59	Arabnezhad et al. 2012
PDAG 1018	GATGCTGAACTCGGACAAAG	TGGGTAGAGATGGTTGGTTG	58	Arabnezhad et al. 2012
mPdCIR 032	CAAATCTTTGCCGTGAG	GGTGTGGAGTAATCATGTAGTAG	52	Billotte et al. 2004
DP 157	TGGACAATGACACCCCTTTT	GCCCACACAACAACCTCTCT	55	Elmeer et al. 2011
DP 159	AGCTCCAATTTGCTGCAGAG	GCTGACCTGGAGTCCAAAAC	55	Elmeer et al. 2011
