# Supplementary material for: Towards sex identification of Asian Palmyra palm (Borassus flabellifer L.) by DNA fingerprinting, suppression subtractive hybridization and de novo transcriptome sequencing
Source: PeerJ. 2019 Jul 10;7:e7268. doi: 10.7717/peerj.7268 (PMC6626516; doi:10.7717/peerj.7268)
Supplement: Table S8 — Raw data. F and M represent clones from female and male, respectively. a indicates clones used for PCR analysis of gDNA from males and females. [file peerj-07-7268-s012.xlsx]

## Sheet: Sheet1
Table S8. Selected SSH clones. F and M represent clones from female and male, respectively.
Clone	% identity	Top hit accessions	Description
F7	95.477	XP_010922767.1	PREDICTED: uncharacterized aarF domain-containing protein kinase At5g05200, chloroplastic [Elaeis guineensis]
F38	51.852	XP_008810788.1	PREDICTED: nuclear cap-binding protein subunit 1-like [Phoenix dactylifera]
F119	97.248	XP_008810595.1	PREDICTED: 60S ribosomal protein L36-3-like [Phoenix dactylifera]
F141	86.517	XP_010920591.1	PREDICTED: metallothionein-like protein type 2 [Elaeis guineensis]
F152	54.73	XP_008788366.1	PREDICTED: proline-rich protein 4-like [Phoenix dactylifera]
F172a	100	XP_008792664.1	PREDICTED: arabinogalactan peptide 16-like [Phoenix dactylifera]
F196 a	92.958	XP_010906272.1	PREDICTED: uncharacterized protein At2g23090-like [Elaeis guineensis]
F197	92.481	XP_010938037.1	PREDICTED: thioredoxin H4-1 [Elaeis guineensis]
F198	97.959	EOY23660.1	Ubiquitin supergroup,Ribosomal protein L40e [Theobroma cacao]
F205 a	66.327	XP_010920591.1	PREDICTED: metallothionein-like protein type 2 [Elaeis guineensis]
F215 a	92.941	XP_010934587.1	PREDICTED: tubulin-folding cofactor B [Elaeis guineensis]
F356	91.781	XP_010905100.1	PREDICTED: heavy metal-associated isoprenylated plant protein 39-like [Elaeis guineensis]
F507 a	77.108	XP_010910470.1	PREDICTED: PLASMODESMATA CALLOSE-BINDING PROTEIN 3-like [Elaeis guineensis]
F641	93.274	XP_008790840.1	PREDICTED: deSI-like protein At4g17486 [Phoenix dactylifera]
F698	93.778	XP_010913953.1	PREDICTED: E3 ubiquitin-protein ligase UPL5 isoform X1 [Elaeis guineensis]
F777	89.773	XP_010917969.1	PREDICTED: 30S ribosomal protein S20, chloroplastic [Elaeis guineensis]
F793 a	100	NP_001078516.1	Histone superfamily protein [Arabidopsis thaliana]
F802	91.228	XP_008785613.1	PREDICTED: protein SPIRAL1-like 3 [Phoenix dactylifera]
F828	87.611	XP_010943231.1	PREDICTED: receptor-like protein kinase HAIKU2 [Elaeis guineensis]
F830	44.444	XP_010929974.1	PREDICTED: uncharacterized protein LOC105051309 isoform X4 [Elaeis guineensis]
F996 a	96.277	XP_019711090.1	putative RNA recognition motif-containing protein [Elaeis guineensis]
F1000	91.379	XP_008786466.1	PREDICTED: uncharacterized protein LOC103704798 [Phoenix dactylifera]
F1023 a	84.507	XP_010932524.1	PREDICTED: E3 ubiquitin ligase BIG BROTHER-related isoform X1 [Elaeis guineensis]
F1094 a	96.241	XP_019707885.1	PREDICTED: ranBP2-type zinc finger protein At1g67325 isoform X1 [Elaeis guineensis]
F1598	93.846	OAY66523.1	Transcription initiation factor TFIID subunit 7 [Ananas comosus]
F1625	91.88	XP_008804081.1	PREDICTED: 60S ribosomal protein L7a-1-like [Phoenix dactylifera]
F1638	80.147	XP_008807117.1	PREDICTED: uncharacterized protein LOC103719568 isoform X2 [Phoenix dactylifera]
F2252	96.429	AEQ94119.1	UDP-arabinopyranose mutase 1 [Elaeis guineensis]
F3360	85.714	NP_001316528.1	NADH-ubiquinone reductase complex 1 MLRQ subunit-like protein [Solanum lycopersicum]
M13	98.507	XP_008784658.1	PREDICTED: probable histone H2A.2 [Phoenix dactylifera]
M63	81.699	XP_008792668.1	PREDICTED: transcription factor bHLH51-like [Phoenix dactylifera]
M64	49.606	XP_008806417.1	PREDICTED: calmodulin-binding transcription activator 4-like isoform X1 [Phoenix dactylifera]
M65	85.235	XP_008785000.1	PREDICTED: trans-2-enoyl-CoA reductase, mitochondrial-like [Phoenix dactylifera]
M67	96.97	XP_019706079.1	PREDICTED: NADH dehydrogenase [ubiquinone] 1 alpha subcomplex subunit 1 [Elaeis guineensis]
M76	99.145	XP_008812120.1	PREDICTED: WD-40 repeat-containing protein MSI1 [Phoenix dactylifera]
M78	97.059	XP_008775187.1	PREDICTED: 60S ribosomal protein L15 [Phoenix dactylifera]
M79	93.865	XP_010923192.1	PREDICTED: universal stress protein PHOS32 [Elaeis guineensis]
M80	96.407	XP_010921684.1	PREDICTED: translationally-controlled tumor protein homolog [Elaeis guineensis]
M87	91.86	XP_010939999.1	PREDICTED: uncharacterized protein LOC105058688 [Elaeis guineensis]
M88	100	XP_008810605.1	PREDICTED: metallothionein-like protein type 2 isoform X2 [Phoenix dactylifera]
M91 a	95.545	XP_008809438.1	PREDICTED: probable aquaporin PIP2-6 [Phoenix dactylifera]
M97	95.455	XP_008783987.1	PREDICTED: 60S acidic ribosomal protein P2B-like [Phoenix dactylifera]
M106	90.625	XP_010937482.1	PREDICTED: PLAT domain-containing protein 3-like [Elaeis guineensis]
M108 a	97.537	XP_010918870.1	PREDICTED: GTP-binding nuclear protein Ran-A1 [Elaeis guineensis]
M111 a	100	AFR42026.1	alpha-tubulin [Populus trichocarpa]
M121	83.333	XP_010929165.1	PREDICTED: early nodulin-like protein 3 [Elaeis guineensis]
M149 a	77.612	XP_010918935.1	PREDICTED: GDSL esterase/lipase LTL1 [Elaeis guineensis]
M168	91.403	XP_010919768.1	PREDICTED: histone-lysine N-methyltransferase, H3 lysine-9 specific SUVH6-like [Elaeis guineensis]
M174	82.143	XP_008810435.1	PREDICTED: glutathione transferase GST 23-like [Phoenix dactylifera]
M191	100	XP_010912312.1	PREDICTED: 40S ribosomal protein S14 [Elaeis guineensis]
M204	98.214	XP_008794946.1	PREDICTED: histone H2B.11-like [Phoenix dactylifera]
M232	95.894	XP_010930747.1	PREDICTED: replication factor C subunit 2 [Elaeis guineensis]
M245	89.571	XP_008790992.1	PREDICTED: something about silencing protein 10 [Phoenix dactylifera]
M271	91.262	XP_010912743.1	PREDICTED: probable uridine nucleosidase 2 [Elaeis guineensis]
M312	95.455	XP_008788135.1	PREDICTED: rRNA-processing protein efg1 [Phoenix dactylifera]
M316	93.97	XP_010908087.1	PREDICTED: TRAF-type zinc finger domain-containing protein 1 isoform X2 [Elaeis guineensis]
M319	94.949	XP_010904563.1	PREDICTED: ras-related protein RHN1 isoform X1 [Elaeis guineensis]
M322	88.742	XP_008789877.1	PREDICTED: universal stress protein PHOS34 isoform X1 [Phoenix dactylifera]
M340	92.818	XP_010907063.1	PREDICTED: THO complex subunit 4A [Elaeis guineensis]
M343	77.778	XP_008805778.1	PREDICTED: uncharacterized protein LOC103718642 [Phoenix dactylifera]
M373 a	94.634	XP_008811147.1	PREDICTED: heat shock protein 81-1-like [Phoenix dactylifera]
M377	99.107	XP_010937685.1	PREDICTED: histone H2A-like [Elaeis guineensis]
M390	95.062	XP_008789316.1	PREDICTED: LOW QUALITY PROTEIN: peroxiredoxin-2C-like [Phoenix dactylifera]
M475	86.517	WP_108990842.1	PREDICTED: metallothionein-like protein type 2 [Elaeis guineensis]
M502	94.161	XP_010910853.1	PREDICTED: uncharacterized protein LOC105036818 [Elaeis guineensis]
M507	90.85	XP_008813666.1	PREDICTED: glutathione S-transferase F10-like [Phoenix dactylifera]
M520	85.256	XP_009409760.1	PREDICTED: 18.1 kDa class I heat shock protein-like [Musa acuminata subsp. malaccensis]
M563	93.227	XP_008788711.1	PREDICTED: haloacid dehalogenase-like hydrolase domain-containing protein Sgpp [Phoenix dactylifera]
M599	91.304	XP_008803319.1	PREDICTED: histone H1-like [Phoenix dactylifera]
M605	97.959	XP_010936051.1	PREDICTED: 60S ribosomal protein L18a-2 [Elaeis guineensis]
M606 a	85	XP_019708621.1	PREDICTED: cyclic dof factor 3-like [Elaeis guineensis]
M633	95.402	OTF94879.1	putative histone H21 [Helianthus annuus]
M703	74.292	XP_019705855.1	PREDICTED: elongation factor 1-alpha isoform X1 [Elaeis guineensis]
M746 a	93.443	XP_017699365.1	PREDICTED: protein TPR1-like [Phoenix dactylifera]
M750	92.593	XP_019709944.1	PREDICTED: lariat debranching enzyme isoform X2 [Elaeis guineensis]
M791	85.893	XP_008782416.1	PREDICTED: LOW QUALITY PROTEIN: RAN GTPase-activating protein 1-like [Phoenix dactylifera]
M875	100	XP_012071961.1	protein SHI RELATED SEQUENCE 1 [Jatropha curcas]
M1042	96.835	XP_010933682.1	PREDICTED: nudC domain-containing protein 2 [Elaeis guineensis]
M1062	79.464	XP_010941158.1	PREDICTED: uncharacterized protein LOC105059529 [Elaeis guineensis]
M1073	97.059	XP_010938140.1	PREDICTED: proteasome subunit beta type-2-B [Elaeis guineensis]
M1100	81.25	XP_008804879.1	PREDICTED: sec-independent protein translocase protein TATA, chloroplastic-like [Phoenix dactylifera]
M1151	98.925	XP_022756686.1	elongation factor 1-alpha [Durio zibethinus]
M1164	90.566	XP_008813014.1	PREDICTED: uncharacterized protein LOC103723764 [Phoenix dactylifera]
M1172	96.552	OTF94879.1	putative histone H21 [Helianthus annuus]
M1308	92.857	PSS17659.1	40S ribosomal protein like [Actinidia chinensis var. chinensis]
M1627	96.581	XP_010919758.1	PREDICTED: nucleoside diphosphate kinase B [Elaeis guineensis]
M1638	92.053	XP_013631332.1	PREDICTED: histone H3.2-like [Brassica oleracea var. oleracea]
M2881	96.552	XP_010932550.1	PREDICTED: trafficking protein particle complex subunit 3 [Elaeis guineensis]
M2882	96.203	OEL24210.1	Calmodulin [Dichanthelium oligosanthes]
a indicates clones used for PCR analysis of gDNA from males and females.
