# Supplementary material for: Towards sex identification of Asian Palmyra palm (Borassus flabellifer L.) by DNA fingerprinting, suppression subtractive hybridization and de novo transcriptome sequencing
Source: PeerJ. 2019 Jul 10;7:e7268. doi: 10.7717/peerj.7268 (PMC6626516; doi:10.7717/peerj.7268)
Supplement: Table S9 [file peerj-07-7268-s013.xlsx]

## Sheet: Sheet1
Table S9. SSH clone based primers for PCR analysis of gDNA from males and females
Primer	Forward primer (5’-3')	Reverse primer (5'-3')
F1023	CTCAAATTCGGCAGGATCGG	AGGAGAGGGCGTACATGATG
F1094	CAGGCCCACACATGACATTC	CGTCAGCATTGCAGGCATAT
F172	TTTGGTTTGATGGTCGTCGC	ATAGGTGAGGACTAGGGCCA
F205	CCGAGGTTTGCGTCTGTATG	AGTTCGACCACAGAGCATGA
F215	TCCCTGTATCACCCAGTTCG	CCAGGCAGTGAAAGCAAACT
F507	CATGGATGGCAGTGATGGTG	CTCCCCATCCTTACCCATCC
F793	GACATTCAGCTTGCTCGGAG	ATGAACGACCAGAGGAGCAA
F196	CTTGCACTGGATCGTCATGG	CTCCCTGCCTCCTCTCTTTT
F996	GCATAACAGACACATCGCGT	CTTTCCAGGTCCGAGGTCAT
M78	CCAGGCTGTTAAGGTGGTTG	AGCTGCCATCATCATGCATG
M108	AGGAGAAGTTTGGTGGGCTT	GCTTTCACCTGCCTGTTCTT
M606	AGAGCACATGAGGGGATCTG	AACCTGACCAGCTCCAGTAG
M111	ATGCCCTCACCAACATACCA	TTGTTGACTGGTGCCCTACT
M149	GTTCGGAACCAACATTGCCT	CTTCGTCGGAGCTTCACCTA
M746	CTCTGCGTTGATACCACTGC	TTTGTGGGGAATTGTGAGCG
M520	GGTGGAGGTAGAGGAGGGTA	TTTCACCTCGGGCTTCTTCT
M373	CCTTGTCAGCCCAAACTTCC	TGGTTCCACGCAGAGTACAT
M79	TCCTCCATGTCATGAACCCC	TGCATCACCCCAGTACAACT
M91	GTCCTCGTCTACACCGTCTT	AGAAGATCCACTGGTCGTCC
