# Supplementary material for: Towards sex identification of Asian Palmyra palm (Borassus flabellifer L.) by DNA fingerprinting, suppression subtractive hybridization and de novo transcriptome sequencing
Source: PeerJ. 2019 Jul 10;7:e7268. doi: 10.7717/peerj.7268 (PMC6626516; doi:10.7717/peerj.7268)
Supplement: Table S10 — Transcript IDs are listed based on enzyme IDs. [file peerj-07-7268-s014.xlsx]

## Sheet: Sheet1
Table S10. Transcript IDs of starch and sucrose metabolism (KEGG map00500)
Enzyme	Ezyme ID	Seqs of Enzyme	Seqs	Pathway ID
decarboxylase	ec:4.1.1.35	11	c138156_g1_i8, c140260_g3_i1, c123400_g1_i1, c138156_g1_i4, c138156_g1_i5, c138156_g1_i1, c171633_g1_i1, c185063_g1_i1, c138156_g1_i2, c138156_g1_i3, c68433_g1_i1	map00500
phosphodismutase	ec:2.7.1.41	1	c123537_g1_i1	map00500
endo-1,4-beta-D-glucanase	ec:3.2.1.4	56	c135005_g1_i1, c212254_g1_i1, c14894_g1_i1, c128514_g1_i3, c166280_g1_i1, c198350_g1_i1, c14894_g1_i2, c129817_g2_i3, c212989_g1_i1, c129817_g2_i2, c129817_g2_i1, c215067_g1_i1, c147585_g1_i1, c170339_g1_i1, c135483_g1_i1, c97710_g1_i2, c135483_g1_i3, c135483_g1_i2, c97710_g1_i1, c106811_g2_i1, c135211_g1_i1, c135211_g1_i2, c135211_g1_i3, c136960_g4_i1, c129817_g1_i1, c125447_g1_i2, c196914_g1_i1…	map00500
saccharogen amylase	ec:3.2.1.2	42	c95776_g1_i2, c137073_g2_i1, c95776_g1_i1, c162956_g1_i1, c137073_g2_i6, c176731_g1_i1, c129066_g1_i1, c137073_g2_i4, c137073_g2_i5, c137073_g2_i2, c129066_g1_i2, c137073_g2_i3, c140608_g2_i2, c140608_g2_i3, c162442_g1_i1, c140608_g2_i1, c140608_g2_i6, c140608_g2_i4, c140608_g2_i5, c75444_g1_i1, c128261_g1_i1, c137816_g3_i1, c75444_g1_i2, c213106_g1_i1, c124547_g1_i1, c121457_g1_i1, c128261_g1_i3…	map00500
glycogenase	ec:3.2.1.1	20	c126805_g1_i4, c126805_g1_i3, c126805_g1_i2, c126805_g1_i1, c172851_g1_i1, c179587_g1_i1, c167403_g1_i1, c155956_g1_i1, c140745_g1_i4, c139386_g1_i1, c140745_g1_i7, c197328_g1_i1, c120907_g1_i1, c120907_g3_i1, c120907_g2_i1, c120907_g3_i2, c101294_g1_i1, c137631_g1_i3, c137631_g1_i2, c137631_g1_i1	map00500
1,4-alpha-galacturonidase	ec:3.2.1.67	5	c140863_g2_i4, c140863_g2_i2, c128136_g1_i1, c125569_g2_i1, c138810_g1_i5	map00500
isomerase	ec:5.3.1.9	6	c136668_g1_i1, c136668_g1_i2, c123117_g1_i2, c123117_g1_i1, c129781_g1_i2, c129781_g1_i1	map00500
alpha-glucosidase	ec:3.2.1.48	42	c76775_g1_i1, c130400_g1_i4, c130400_g1_i2, c140895_g1_i2, c95964_g1_i1, c140895_g1_i8, c140895_g1_i5, c92453_g1_i1, c130400_g1_i1, c67345_g1_i1, c127209_g1_i2, c127209_g1_i1, c213860_g1_i1, c104448_g2_i1, c124134_g1_i1, c137000_g1_i5, c209971_g1_i1, c125521_g1_i2, c131801_g1_i2, c131801_g1_i3, c131268_g1_i1, c131801_g1_i4, c125521_g1_i1, c131801_g1_i5, c137000_g1_i3, c137000_g1_i4, c95964_g2_i1,…	map00500
1,3-beta-glucosidase	ec:3.2.1.58	6	c141271_g3_i3, c141271_g3_i2, c106480_g1_i1, c129850_g1_i1, c141271_g3_i4, c177563_g1_i1	map00500
adenylyltransferase	ec:2.7.7.27	15	c144233_g1_i1, c160727_g1_i1, c185538_g1_i1, c150354_g1_i1, c137743_g1_i2, c137743_g1_i1, c134878_g1_i1, c137743_g1_i4, c134878_g1_i2, c137743_g1_i3, c137743_g1_i6, c137743_g1_i5, c128071_g1_i3, c137743_g1_i7, c128071_g2_i1	map00500
maltase	ec:3.2.1.20	2	c49108_g1_i1, c175274_g1_i1	map00500
gentiobiase	ec:3.2.1.21	106	c138494_g1_i3, c80308_g1_i1, c139907_g2_i3, c139907_g2_i2, c139907_g2_i4, c139907_g2_i6, c139773_g2_i1, c141595_g1_i3, c141595_g1_i4, c124551_g2_i1, c141595_g1_i1, c141595_g1_i2, c132485_g3_i1, c135092_g1_i3, c135092_g1_i2, c161640_g1_i1, c129894_g1_i1, c67305_g1_i1, c141595_g1_i5, c68099_g1_i1, c107362_g1_i2, c107362_g1_i1, c108673_g2_i1, c34149_g1_i1, c108673_g2_i2, c128668_g1_i3, c136671_g1_i4…	map00500
synthase	ec:2.4.1.34	39	c132939_g3_i3, c165019_g1_i1, c138394_g1_i1, c138394_g1_i2, c135462_g1_i2, c135462_g1_i1, c217225_g1_i1, c176833_g1_i1, c195604_g1_i1, c207913_g1_i1, c146393_g1_i1, c128709_g1_i1, c128709_g1_i2, c109447_g1_i2, c132939_g3_i1, c109447_g1_i1, c172353_g1_i1, c173825_g1_i1, c218100_g1_i1, c130602_g3_i1, c135462_g1_i4, c135462_g1_i3, c197544_g1_i1, c117774_g1_i2, c208418_g1_i1, c117774_g1_i1, c164738_g…	map00500
trehalase	ec:3.2.1.28	5	c138228_g1_i1, c138228_g2_i1, c163593_g1_i1, c138228_g1_i2, c173494_g1_i1	map00500
invertase	ec:3.2.1.26	45	c76775_g1_i1, c130400_g1_i4, c140895_g1_i3, c130400_g1_i2, c140895_g1_i2, c95964_g1_i1, c140895_g1_i8, c140895_g1_i5, c92453_g1_i1, c130400_g1_i1, c67345_g1_i1, c127209_g1_i2, c127209_g1_i1, c213860_g1_i1, c104448_g2_i1, c124134_g1_i1, c137000_g1_i5, c209971_g1_i1, c125521_g1_i2, c131801_g1_i2, c131801_g1_i3, c131268_g1_i1, c131801_g1_i4, c125521_g1_i1, c131801_g1_i5, c137000_g1_i3, c137000_g1_i4…	map00500
beta-glucuronide glucuronohydrolase glucuronidase	ec:3.2.1.31	6	c135441_g1_i2, c140428_g3_i1, c187081_g1_i1, c140428_g2_i3, c140428_g2_i2, c140428_g2_i1	map00500
endo-1,3-beta-D-glucosidase	ec:3.2.1.39	30	c95680_g2_i1, c199879_g1_i1, c35593_g1_i1, c74061_g1_i1, c116458_g2_i1, c29627_g1_i1, c127925_g1_i1, c104311_g1_i1, c83504_g1_i1, c124551_g2_i1, c95885_g1_i1, c127727_g1_i1, c132485_g1_i1, c104311_g1_i2, c132485_g1_i2, c132485_g3_i1, c135092_g1_i3, c135092_g1_i2, c67305_g1_i1, c52920_g1_i2, c130303_g1_i1, c68099_g1_i1, c130303_g1_i2, c52920_g1_i1, c107362_g1_i2, c107362_g1_i1, c128668_g1_i3, c126…	map00500
4-alpha-galacturonosyltransferase	ec:2.4.1.43	59	c135735_g2_i5, c134006_g1_i2, c31731_g1_i1, c134006_g1_i3, c154873_g1_i1, c93520_g1_i1, c134006_g1_i4, c141422_g4_i1, c138573_g4_i1, c133042_g2_i2, c133042_g2_i3, c105161_g2_i1, c133042_g2_i1, c133964_g2_i1, c103530_g1_i1, c133042_g2_i8, c133042_g2_i6, c133042_g2_i7, c165669_g1_i1, c133042_g2_i4, c133042_g2_i5, c58597_g1_i1, c144815_g1_i1, c138573_g3_i1, c214680_g1_i1, c139899_g1_i1, c179250_g1_i…	map00500
1,4-beta-xylosidase	ec:3.2.1.37	29	c122484_g2_i1, c141595_g2_i1, c138494_g1_i3, c138494_g1_i5, c84793_g1_i1, c175048_g1_i1, c122484_g1_i1, c96703_g1_i1, c141595_g1_i3, c141595_g1_i4, c178363_g1_i1, c184185_g1_i1, c122484_g3_i1, c128252_g2_i2, c141595_g1_i1, c122484_g3_i2, c128252_g2_i1, c141595_g1_i2, c140274_g2_i1, c140274_g2_i2, c134766_g1_i1, c140111_g2_i2, c140274_g2_i3, c140111_g2_i1, c140274_g2_i4, c140274_g2_i5, c141595_g1_…	map00500
phosphorylase	ec:2.4.1.1	28	c104633_g1_i1, c162415_g1_i1, c135721_g1_i4, c126213_g1_i1, c135721_g1_i3, c135721_g1_i2, c135721_g1_i1, c137949_g1_i2, c137949_g1_i1, c136850_g1_i4, c138044_g1_i1, c136850_g1_i2, c138044_g1_i4, c138044_g1_i5, c138044_g1_i2, c138044_g1_i3, c132859_g2_i1, c133957_g1_i2, c138044_g1_i6, c138044_g1_i7, c133957_g1_i1, c150492_g1_i1, c139734_g1_i2, c139734_g1_i1, c139734_g1_i4, c139734_g1_i3, c45272_g1…	map00500
branching enzyme	ec:2.4.1.18	7	c1022_g1_i1, c119178_g1_i1, c140867_g2_i1, c216104_g1_i1, c140867_g2_i2, c157490_g1_i1, c182450_g1_i1	map00500
1-naphthol glucuronyltransferase	ec:2.4.1.17	33	c137324_g1_i3, c137324_g1_i2, c93494_g2_i1, c137324_g1_i1, c137324_g1_i7, c137324_g1_i6, c137324_g1_i5, c137324_g1_i4, c185109_g1_i1, c119504_g1_i1, c131118_g3_i1, c130168_g2_i1, c136278_g2_i2, c137014_g2_i4, c136278_g2_i3, c137014_g2_i3, c217453_g1_i1, c126788_g1_i4, c132688_g1_i1, c127197_g1_i1, c137014_g2_i2, c136278_g2_i1, c92076_g1_i1, c20288_g1_i1, c119504_g2_i1, c136278_g1_i1, c130773_g2_i…	map00500
synthase (UDP-forming)	ec:2.4.1.15	29	c177948_g1_i1, c135378_g1_i7, c135378_g1_i6, c135378_g1_i5, c135378_g1_i4, c181606_g1_i1, c135378_g1_i3, c135378_g1_i2, c139297_g2_i4, c128488_g1_i1, c128488_g1_i2, c118950_g1_i2, c139297_g2_i2, c55332_g1_i1, c118760_g1_i1, c139852_g1_i5, c139852_g1_i4, c128488_g1_i7, c128488_g1_i8, c136913_g2_i1, c128488_g1_i3, c128488_g1_i4, c99399_g1_i1, c128488_g1_i5, c135378_g2_i1, c128488_g1_i6, c209754_g1_…	map00500
synthase	ec:2.4.1.14	18	c141100_g2_i8, c141100_g2_i7, c141100_g2_i6, c82785_g1_i1, c6494_g1_i1, c141100_g2_i1, c163248_g1_i1, c141100_g2_i5, c174_g1_i1, c141100_g2_i4, c141100_g2_i3, c205417_g1_i1, c141100_g2_i2, c208467_g1_i1, c209635_g1_i1, c178188_g1_i1, c14782_g1_i1, c114205_g1_i1	map00500
synthase	ec:2.4.1.13	44	c82785_g1_i1, c6494_g1_i1, c148370_g1_i1, c120107_g2_i1, c205417_g1_i1, c130991_g3_i1, c209635_g1_i1, c130991_g1_i1, c146992_g1_i1, c178188_g1_i1, c114205_g1_i1, c87623_g1_i1, c128621_g1_i1, c116529_g1_i1, c141100_g2_i8, c128621_g1_i2, c141100_g2_i7, c141100_g2_i6, c138061_g2_i2, c157494_g1_i1, c138061_g2_i3, c197850_g1_i1, c115324_g1_i1, c138061_g2_i1, c141100_g2_i1, c138061_g2_i5, c163248_g1_i1…	map00500
synthase (UDP-forming)	ec:2.4.1.12	98	c137562_g1_i10, c96665_g1_i1, c140621_g2_i2, c140621_g2_i1, c140621_g2_i4, c140621_g2_i3, c140308_g1_i2, c140621_g2_i6, c140308_g1_i3, c140621_g2_i5, c140621_g2_i10, c140308_g1_i4, c140621_g2_i8, c210859_g1_i1, c140621_g2_i7, c23397_g1_i1, c140621_g2_i9, c140308_g1_i1, c125487_g2_i1, c175290_g1_i1, c59449_g1_i1, c172098_g1_i1, c160701_g1_i1, c149774_g1_i1, c105321_g1_i1, c121997_g1_i1, c121417_g2…	map00500
synthase	ec:2.4.1.11	24	c136604_g1_i1, c131940_g1_i4, c131940_g1_i2, c131940_g1_i3, c139699_g1_i4, c155610_g1_i1, c190998_g1_i1, c131940_g1_i1, c139699_g1_i3, c139699_g1_i2, c139699_g1_i1, c141778_g1_i1, c136604_g1_i3, c138771_g1_i2, c136604_g1_i2, c138771_g1_i1, c138771_g1_i4, c139699_g1_i5, c138771_g1_i5, c172223_g1_i1, c179633_g1_i1, c137873_g1_i2, c19775_g1_i1, c137873_g1_i1	map00500
disproportionating enzyme	ec:2.4.1.25	8	c139704_g1_i1, c139704_g1_i3, c139704_g1_i2, c137585_g1_i2, c137585_g1_i1, c137585_g1_i4, c137585_g1_i3, c96265_g1_i1	map00500
synthase (glycosyl-transferring)	ec:2.4.1.21	13	c131940_g1_i2, c131940_g1_i3, c139699_g1_i4, c131940_g1_i1, c139699_g1_i3, c139699_g1_i2, c139699_g1_i1, c138771_g1_i2, c138771_g1_i1, c138771_g1_i4, c139699_g1_i5, c138771_g1_i5, c179633_g1_i1	map00500
pectin depolymerase	ec:3.2.1.15	75	c152489_g1_i1, c163490_g1_i1, c110645_g1_i1, c136145_g1_i1, c134597_g1_i2, c134597_g1_i1, c121879_g1_i1, c129834_g1_i2, c129834_g1_i1, c121879_g1_i2, c166329_g1_i1, c134597_g1_i4, c109564_g1_i1, c133839_g2_i1, c133839_g2_i2, c203453_g1_i1, c136919_g1_i3, c197299_g1_i1, c122208_g1_i1, c135691_g1_i3, c183316_g1_i1, c135691_g1_i2, c135691_g1_i1, c128136_g1_i1, c136145_g1_i3, c136145_g1_i2, c89046_g1…	map00500
diphosphatase	ec:3.6.1.9	9	c137705_g1_i2, c137705_g1_i1, c137705_g1_i3, c137705_g1_i6, c137705_g1_i5, c209885_g1_i1, c118642_g1_i2, c118642_g1_i1, c6852_g1_i1	map00500
glucokinase (phosphorylating)	ec:2.7.1.2	14	c123307_g2_i2, c120141_g1_i2, c120141_g1_i1, c127088_g2_i2, c127088_g2_i1, c127088_g1_i2, c184365_g1_i1, c124962_g1_i3, c124962_g1_i2, c119288_g1_i1, c124962_g1_i4, c137690_g2_i1, c158309_g1_i1, c173083_g1_i1	map00500
hexokinase type IV glucokinase	ec:2.7.1.1	44	c123307_g2_i2, c123307_g2_i1, c120141_g1_i2, c120141_g1_i1, c198707_g1_i1, c123780_g1_i1, c123780_g1_i2, c97482_g1_i3, c97482_g1_i2, c127088_g1_i1, c127088_g1_i2, c97482_g1_i1, c194242_g1_i1, c112525_g1_i2, c119288_g1_i1, c137505_g4_i1, c137505_g2_i1, c137690_g2_i1, c123780_g2_i4, c146170_g1_i1, c112525_g1_i1, c123780_g2_i1, c123780_g2_i3, c127088_g2_i2, c127088_g2_i1, c137911_g1_i2, c137911_g1_i…	map00500
fructokinase (phosphorylating)	ec:2.7.1.4	35	c120141_g1_i2, c120141_g1_i1, c198707_g1_i1, c123780_g1_i1, c123780_g1_i2, c97482_g1_i3, c97482_g1_i2, c127088_g1_i2, c97482_g1_i1, c194242_g1_i1, c112525_g1_i2, c119288_g1_i1, c137505_g4_i1, c137505_g2_i1, c137690_g2_i1, c123780_g2_i4, c112525_g1_i1, c123780_g2_i1, c123780_g2_i3, c127088_g2_i2, c127088_g2_i1, c184365_g1_i1, c124962_g1_i3, c140152_g1_i3, c124962_g1_i2, c124962_g1_i4, c137505_g3_i…	map00500
trehalose 6-phosphatase	ec:3.1.3.12	58	c138068_g1_i3, c138068_g1_i2, c140993_g1_i1, c140993_g1_i4, c140993_g1_i5, c140993_g1_i3, c140993_g1_i6, c140993_g1_i7, c128488_g1_i1, c128488_g1_i2, c145000_g1_i1, c140476_g1_i2, c118950_g1_i2, c140476_g1_i4, c55332_g1_i1, c118760_g1_i1, c140476_g1_i1, c139852_g1_i1, c139022_g1_i13, c139852_g1_i5, c139022_g1_i12, c139852_g1_i4, c139022_g1_i14, c170575_g1_i1, c128488_g1_i7, c128488_g1_i8, c136913…	map00500
4-epimerase	ec:5.1.3.6	4	c136793_g3_i1, c136793_g2_i1, c136793_g4_i1, c110128_g2_i1	map00500
diphosphatase	ec:3.6.1.21	7	c132774_g1_i5, c123982_g1_i3, c123982_g1_i4, c132774_g1_i3, c123982_g1_i2, c132774_g1_i2, c132774_g1_i1	map00500
phosphatase	ec:3.1.3.24	6	c67469_g1_i1, c67469_g1_i2, c130115_g1_i2, c130115_g1_i1, c130115_g1_i3, c127924_g1_i1	map00500
uridylyltransferase	ec:2.7.7.9	7	c136547_g1_i4, c136547_g1_i6, c136547_g1_i7, c136547_g1_i8, c136547_g1_i9, c207049_g1_i1, c116059_g1_i1	map00500
pectin demethoxylase	ec:3.1.1.11	69	c21306_g1_i1, c118764_g1_i1, c134036_g1_i2, c117487_g1_i1, c134036_g1_i1, c189089_g1_i1, c117487_g1_i3, c131353_g2_i1, c131353_g2_i2, c133575_g1_i1, c138591_g2_i4, c127564_g1_i1, c138591_g2_i3, c138591_g2_i2, c133575_g1_i2, c133575_g1_i3, c121974_g2_i1, c163178_g1_i1, c186143_g1_i1, c209245_g1_i1, c130920_g1_i2, c205587_g1_i1, c130920_g1_i1, c173070_g1_i1, c106539_g1_i1, c140843_g3_i1, c66584_g1_…	map00500
synthase	ec:2.4.2.24	6	c117812_g2_i2, c117812_g1_i1, c130773_g2_i2, c130773_g2_i1, c125189_g2_i1, c112122_g2_i1	map00500
(alpha-D-glucose-1,6-bisphosphate-dependent)	ec:5.4.2.2	9	c54672_g1_i1, c138625_g1_i1, c101486_g1_i1, c138625_g1_i2, c101486_g1_i2, c138625_g1_i3, c182515_g1_i1, c169145_g1_i1, c184673_g1_i1	map00500
beta-pgm (gene name)	ec:5.4.2.6	3	c138728_g1_i4, c138728_g1_i3, c138728_g1_i1	map00500
6-dehydrogenase	ec:1.1.1.22	14	c97592_g1_i1, c116849_g1_i1, c138798_g3_i2, c138798_g3_i3, c118287_g1_i1, c138798_g3_i4, c118287_g1_i2, c138798_g3_i5, c138798_g3_i6, c138798_g3_i7, c116849_g2_i1, c116849_g3_i1, c138798_g1_i1, c138798_g3_i1	map00500
