# Supplementary material for: Towards sex identification of Asian Palmyra palm (Borassus flabellifer L.) by DNA fingerprinting, suppression subtractive hybridization and de novo transcriptome sequencing
Source: PeerJ. 2019 Jul 10;7:e7268. doi: 10.7717/peerj.7268 (PMC6626516; doi:10.7717/peerj.7268)
Supplement: Table S11 — Female-highly presented transcripts were selected based on this criteria: (FO > 10FY > 0.5MO = 0MY = 0) + (FO > 0.5FY > 10MO = 0MY = 0) + (FO > 5FY > 5MO = 0MY = 0) +(length >300 bp), and that of male -highly presented transcripts were selected based on this criteria: (MO > 10MY > 0.5FO = 0FY = 0) + (MO > 0.5MY > 10FO = 0FY = 0) + (MO > 5MY > 5FO = 0FY = 0) +(length >300). [file peerj-07-7268-s015.xlsx]

## Sheet: Sheet1
Table S11. Transcript IDs of male- and female-highly presented transcripts.
(FO>10 FY>0.5 MO=0 MY=0)+(FO>0.5 FY>10 MO=0 MY=0)+(FO >5 FY>5 MO=0 MY=0)+(length >300bp)
Name	FO_FPKM	FY_FPKM	MO_FPKM	MY_FPKM	Length	Start	End	Coverage		Description
c101671_g1_i2	28.28	2.68	0	0	336					No hit
c115804_g1_i1	23.67	3.41	0	0	587					No hit
c119665_g1_i1	1.61	21.24	0	0	787	266	538	34.69	EG45-like domain containing	TAIR|locus:2118656 - symbol:AT4G30380 "AT4G30380" species:3702 "Arabidopsis thaliana" [GO:0003674 "molecular_function" evidence=ND] [GO:0005576 "extracellular region" evidence=ISM;IEA] [GO:0071456 "cellular response to hypoxia" evidence=IEP] Proteomes:UP000006548 GO:GO:0005576 EMBL:CP002687 GO:GO:0071456 InterPro:IPR009009 SUPFAM:SSF50685 Gene3D:2.40.40.10 InterPro:IPR014733 EMBL:AL161577 PIR:C85…
c124458_g1_i1	1.34	11.88	0	0	515					No hit
c125568_g2_i1	8.56	17.25	0	0	570	243	569	57.37		TAIR|locus:2094389 - symbol:AT3G22800 "AT3G22800" species:3702 "Arabidopsis thaliana" [GO:0005576 "extracellular region" evidence=IEA] [GO:0005618 "cell wall" evidence=IEA] [GO:0071555 "cell wall organization" evidence=IEA] [GO:0005199 "structural constituent of cell wall" evidence=ISS] Pfam:PF00560 InterPro:IPR001611 Proteomes:UP000006548 GO:GO:0005618 EMBL:CP002686 GO:GO:0005576 GO:GO:0071555 G…
c128221_g1_i1	42.23	1.41	0	0	346					No hit
c128666_g1_i1	28.08	5.39	0	0	489					No hit
c128769_g1_i1	23.46	2.48	0	0	558					No hit
c129350_g2_i1	11.74	5.87	0	0	303					No hit
c130118_g1_i4	11.18	6.17	0	0	406					No hit
c132453_g2_i1	11	0.75	0	0	785					No hit
c132999_g2_i2	13.53	2.76	0	0	425	133	303	40.24		TAIR|locus:2099387 - symbol:AT3G14820 "AT3G14820" species:3702 "Arabidopsis thaliana" [GO:0005576 "extracellular region" evidence=ISM;IEA] [GO:0016042 "lipid catabolic process" evidence=IEA] [GO:0016298 "lipase activity" evidence=IEA;ISS] [GO:0052689 "carboxylic ester hydrolase activity" evidence=ISS] InterPro:IPR001087 InterPro:IPR008265 Pfam:PF00657 PROSITE:PS01098 InterPro:IPR013831 Proteomes:…
c134439_g1_i2	4.71	15.03	0	0	1328	115	993	66.19		TAIR|locus:2153529 - symbol:PRX52 "AT5G05340" species:3702 "Arabidopsis thaliana" [GO:0004601 "peroxidase activity" evidence=IEA;ISS] [GO:0005576 "extracellular region" evidence=ISM] [GO:0020037 "heme binding" evidence=IEA] [GO:0046872 "metal ion binding" evidence=IEA] [GO:0005618 "cell wall" evidence=IDA] [GO:0048046 "apoplast" evidence=IDA] [GO:0005515 "protein binding" evidence=IPI] [GO:000582…
c134809_g1_i1	4.8	11.68	0	0	446					No hit
c135521_g1_i1	13.25	11.91	0	0	635					No hit
c140670_g3_i2	7.45	17.41	0	0	773					No hit
c141041_g5_i1	10.19	15.46	0	0	447					No hit
c141135_g3_i1	37.79	51.66	0	0	388	233	388	40.21		TAIR|locus:2147087 - symbol:TSL "AT5G20930" species:3702 "Arabidopsis thaliana" [GO:0005524 "ATP binding" evidence=IEA] [GO:0005634 "nucleus" evidence=ISM;IDA;TAS] [GO:0006468 "protein phosphorylation" evidence=IEA] [GO:0016301 "kinase activity" evidence=ISS] [GO:0009507 "chloroplast" evidence=IDA] [GO:0005515 "protein binding" evidence=IPI] [GO:0005737 "cytoplasm" evidence=IDA] [GO:0004674 "prot…
c141135_g3_i2	22.2	68.65	0	0	623	268	405	22.15		TAIR|locus:2147087 - symbol:TSL "AT5G20930" species:3702 "Arabidopsis thaliana" [GO:0005524 "ATP binding" evidence=IEA] [GO:0005634 "nucleus" evidence=ISM;IDA;TAS] [GO:0006468 "protein phosphorylation" evidence=IEA] [GO:0016301 "kinase activity" evidence=ISS] [GO:0009507 "chloroplast" evidence=IDA] [GO:0005515 "protein binding" evidence=IPI] [GO:0005737 "cytoplasm" evidence=IDA] [GO:0004674 "prot…
c156415_g1_i1	17.04	2.32	0	0	475	113	277	34.74		TAIR|locus:4010713928 - symbol:RTFL6 "AT4G35783" species:3702 "Arabidopsis thaliana" [GO:0003674 "molecular_function" evidence=ND] [GO:0005739 "mitochondrion" evidence=ISM] [GO:0048367 "shoot system development" evidence=ISS] InterPro:IPR012552 Proteomes:UP000006548 EMBL:CP002687 GO:GO:0048367 Pfam:PF08137 EMBL:DQ487702 EMBL:BK001760 RefSeq:NP_001078498.1 UniGene:At.67529 EnsemblPlants:AT4G35783.…
c181163_g1_i1	10.25	1	0	0	318	47	283	74.53		UNIPROTKB|Q2F997 - symbol:orf490 "Putative uncharacterized protein orf490" species:39946 "Oryza sativa Indica Group" [GO:0005739 "mitochondrion" evidence=IC] GO:GO:0005739 EMBL:DQ167399 InterPro:IPR013103 Pfam:PF07727 EMBL:JN861111 EMBL:JN861112 EMBL:JF281153 EMBL:JF281154 EMBL:AP011077 RefSeq:YP_514636.1 GeneID:3950738 Gramene:Q2F997 Uniprot:Q2F997
c25245_g1_i1	1.79	13.77	0	0	493					No hit
c35294_g1_i1	10.1	16.97	0	0	689	59	532	68.8		TAIR|locus:2087368 - symbol:scpl40 "AT3G63470" species:3702 "Arabidopsis thaliana" [GO:0004185 "serine-type carboxypeptidase activity" evidence=IEA;ISS] [GO:0005576 "extracellular region" evidence=ISM;IEA] [GO:0006508 "proteolysis" evidence=IEA;ISS] InterPro:IPR001563 InterPro:IPR018202 Pfam:PF00450 PRINTS:PR00724 PROSITE:PS00131 PROSITE:PS00560 Proteomes:UP000006548 EMBL:CP002686 GO:GO:0005576 G…
c46799_g1_i1	1.15	15.29	0	0	521	3	155	29.37		TAIR|locus:2153529 - symbol:PRX52 "AT5G05340" species:3702 "Arabidopsis thaliana" [GO:0004601 "peroxidase activity" evidence=IEA;ISS] [GO:0005576 "extracellular region" evidence=ISM] [GO:0020037 "heme binding" evidence=IEA] [GO:0046872 "metal ion binding" evidence=IEA] [GO:0005618 "cell wall" evidence=IDA] [GO:0048046 "apoplast" evidence=IDA] [GO:0005515 "protein binding" evidence=IPI] [GO:000582…
c79302_g1_i1	108.93	5.92	0	0	703	120	329	29.87		TAIR|locus:2051369 - symbol:AT2G20870 "AT2G20870" species:3702 "Arabidopsis thaliana" [GO:0003674 "molecular_function" evidence=ND] [GO:0005576 "extracellular region" evidence=IEA] [GO:0005618 "cell wall" evidence=IEA] [GO:0005886 "plasma membrane" evidence=ISM] [GO:0008150 "biological_process" evidence=ND] [GO:0031540 "regulation of anthocyanin biosynthetic process" evidence=RCA] Proteomes:UP000…
c132227_g4_i1	8.71	5.03	0	0	502					No hit
c138626_g2_i1	6.41	5.14	0	0	1175	57	809	64.09		TAIR|locus:2066286 - symbol:PLA2A "phospholipase A 2A" species:3702 "Arabidopsis thaliana" [GO:0009507 "chloroplast" evidence=ISM] [GO:0016042 "lipid catabolic process" evidence=IEA] [GO:0045735 "nutrient reservoir activity" evidence=ISS] [GO:0005737 "cytoplasm" evidence=IDA] [GO:0006629 "lipid metabolic process" evidence=IDA] [GO:0009626 "plant-type hypersensitive response" evidence=IEP;IMP] [GO…
c117952_g1_i3	6.74	8.75	0	0	417	349	417	16.55		TAIR|locus:2049218 - symbol:FLA7 "FASCICLIN-like arabinoogalactan 7" species:3702 "Arabidopsis thaliana" [GO:0005886 "plasma membrane" evidence=ISM;IDA] [GO:0031225 "anchored component of membrane" evidence=TAS] [GO:0046658 "anchored component of plasma membrane" evidence=IDA] [GO:0016020 "membrane" evidence=IDA] [GO:0006084 "acetyl-CoA metabolic process" evidence=RCA] [GO:0009664 "plant-type cel…
c133640_g1_i2	5.54	5.48	0	0	408					No hit
c138626_g2_i5	5.55	5.35	0	0	1183	134	817	57.82		TAIR|locus:2066286 - symbol:PLA2A "phospholipase A 2A" species:3702 "Arabidopsis thaliana" [GO:0009507 "chloroplast" evidence=ISM] [GO:0016042 "lipid catabolic process" evidence=IEA] [GO:0045735 "nutrient reservoir activity" evidence=ISS] [GO:0005737 "cytoplasm" evidence=IDA] [GO:0006629 "lipid metabolic process" evidence=IDA] [GO:0009626 "plant-type hypersensitive response" evidence=IEP;IMP] [GO…
c132227_g4_i2	6.02	6.43	0	0	428					No hit
c132500_g1_i1	6.12	8.32	0	0	616	80	319	38.96		TAIR|locus:2177532 - symbol:EXO70F1 "AT5G50380" species:3702 "Arabidopsis thaliana" [GO:0000145 "exocyst" evidence=IEA;ISS] [GO:0005737 "cytoplasm" evidence=ISM] [GO:0006887 "exocytosis" evidence=IEA] [GO:0006904 "vesicle docking involved in exocytosis" evidence=ISS] [GO:0005886 "plasma membrane" evidence=IDA] [GO:0005829 "cytosol" evidence=IDA] [GO:0009644 "response to high light intensity" evid…
c117831_g1_i1	9.75	6.95	0	0	623					No hit
(MO>10 MY>0.5 FO=0 FY=0)+(MO>0.5 MY>10 FO=0 FY=0)+(MO>5 MY>5 FO=0 FY=0)+(length>300)
c118409_g1_i1	0	0	26.52	47.8	565	164	565	71.15	cytochrome P450 78A5-like	TAIR|locus:2023848 - symbol:CYP78A5 "AT1G13710" species:3702 "Arabidopsis thaliana" [GO:0016020 "membrane" evidence=IBA] [GO:0016021 "integral component of membrane" evidence=IEA] [GO:0016709 "oxidoreductase activity, acting on paired donors, with incorporation or reduction of molecular oxygen, NAD(P)H as one donor, and incorporation of one atom of oxygen" evidence=IBA] [GO:0019825 "oxygen bindin…
c138664_g2_i2	0	0	7.41	10.08	407					No hit
c73004_g1_i1	0	0	16.41	6.97	749					No hit
c209791_g1_i1	0	0	10.46	2.3	301					No hit
c79917_g1_i1	0	0	10.12	1.37	320					No hit
c127751_g2_i1	0	0	13.27	6.98	835	2	370	44.19		TAIR|locus:2155021 - symbol:SHI "AT5G66350" species:3702 "Arabidopsis thaliana" [GO:0003677 "DNA binding" evidence=IEA] [GO:0005634 "nucleus" evidence=ISM;TAS] [GO:0006351 "transcription, DNA-templated" evidence=IEA] [GO:0006355 "regulation of transcription, DNA-templated" evidence=IEA] [GO:0007275 "multicellular organismal development" evidence=IEA] [GO:0009734 "auxin-activated signaling pathway…
c108273_g1_i2	0	0	6.65	8.08	308					No hit
c140834_g1_i1	0	0	9.74	5.28	578	282	521	41.52	mitogen-activated kinase kinase kinase NPK1-like isoform X1	UNIPROTKB|Q40541 - symbol:NPK1 "Mitogen-activated protein kinase kinase kinase NPK1" species:4097 "Nicotiana tabacum" [GO:0000919 "cell plate assembly" evidence=IGI] [GO:0005515 "protein binding" evidence=IPI] [GO:0005634 "nucleus" evidence=IDA] [GO:0009524 "phragmoplast" evidence=IDA] InterPro:IPR000719 InterPro:IPR002290 InterPro:IPR008271 InterPro:IPR011009 InterPro:IPR017441 Pfam:PF00069 PROS…
c127196_g2_i1	0	0	8.52	7.02	899					No hit
c48474_g1_i1	0	0	6.35	9.06	503					No hit
c138605_g4_i1	0	0	5.7	8.08	308					No hit
