# Supplementary material for: Towards sex identification of Asian Palmyra palm (Borassus flabellifer L.) by DNA fingerprinting, suppression subtractive hybridization and de novo transcriptome sequencing
Source: PeerJ. 2019 Jul 10;7:e7268. doi: 10.7717/peerj.7268 (PMC6626516; doi:10.7717/peerj.7268)
Supplement: Table S14 — All transcripts identified with GO enrichment analysis analysis using Fisher’s Exact Test (FDR cutoff = 0.01) are presented. [file peerj-07-7268-s018.xlsx]

## Sheet: File S5 enriched GO transcript 
Table S14. Transcript IDS of enriched GO of male- and female-specific transcripts.
GO-ID	Term	Category	FDR	P-Value	#Test	#Ref	#notAnnotTest	#notAnnotRef	Over/Under	TestSeqs	RefSeqs
Female
GO:0005975	carbohydrate metabolic process	P	4.98e-05	6.95e-09	111	2079	1170	41100	OVER	c136941_g1_i1, c118033_g1_i1, c129834_g1_i2, c129834_g1_i1, c132857_g1_i1, c136755_g1_i2, c135956_g1_i3, c136755_g1_i1, c210896_g1_i1, c136617_g1_i1, c136617_g1_i3, c96851_g1_i1, c125614_g3_i2, c121490_g1_i1, c132485_g3_i1, c138016_g1_i1, c138016_g1_i2, c128801_g1_i2, c138016_g1_i5, c128758_g1_i3, c128758_g1_i4, c138369_g1_i3, c138369_g1_i4, c138369_g1_i5, c117058_g1_i2, c128071_g1_i3, c121088_g1…	c120579_g1_i2, c93494_g2_i1, c120579_g1_i1, c166280_g1_i1, c208419_g1_i1, c138591_g2_i4, c138591_g2_i3, c138591_g2_i2, c130991_g1_i1, c20390_g1_i1, c138044_g1_i1, c118760_g1_i1, c138044_g1_i4, c138044_g1_i5, c138044_g1_i2, c138044_g1_i3, c132756_g1_i1, c138044_g1_i6, c138044_g1_i7, c137215_g1_i1, c137215_g1_i2, c140274_g2_i1, c140274_g2_i2, c122208_g1_i1, c140274_g2_i3, c140274_g2_i4, c135691_g1_…
GO:0008974	phosphoribulokinase activity	F	4.98e-05	1.57e-08	8	10	1273	43169	OVER	c121490_g1_i1, c121490_g2_i3, c133514_g1_i6, c133514_g1_i5, c133514_g1_i2, c133514_g1_i1, c133514_g1_i4, c133514_g1_i3	c121490_g2_i1, c208419_g1_i1, c119116_g1_i1, c162313_g1_i1, c8313_g1_i1, c152895_g1_i1, c191994_g1_i1, c121490_g2_i2, c149475_g1_i1, c113966_g1_i1
GO:0071554	cell wall organization or biogenesis	P	4.98e-05	1.88e-08	54	761	1227	42418	OVER	c121974_g1_i1, c137324_g1_i4, c129834_g1_i2, c129834_g1_i1, c210896_g1_i1, c135808_g1_i1, c125189_g2_i1, c136096_g1_i2, c136096_g1_i4, c131721_g1_i1, c134621_g1_i2, c101724_g1_i3, c101724_g1_i1, c133042_g2_i4, c101724_g1_i2, c130920_g1_i1, c134766_g1_i1, c92076_g1_i1, c134379_g2_i1, c28013_g1_i2, c138369_g1_i3, c138369_g1_i4, c131838_g1_i1, c130773_g2_i2, c138369_g1_i5, c130227_g2_i1, c140198_g4_…	c133175_g1_i5, c93494_g2_i1, c133623_g1_i1, c133175_g1_i4, c134471_g2_i1, c110337_g1_i1, c133175_g1_i7, c133175_g1_i6, c138494_g1_i3, c138494_g1_i5, c95324_g2_i1, c49378_g1_i1, c166280_g1_i1, c135195_g2_i1, c134583_g1_i1, c138591_g2_i4, c138591_g2_i3, c130168_g2_i1, c138591_g2_i2, c157424_g1_i1, c20390_g1_i1, c59449_g1_i1, c136919_g1_i3, c134379_g2_i6, c134184_g2_i6, c186143_g1_i1, c140274_g2_i1,…
GO:0071669	plant-type cell wall organization or biogenesis	P	0.00109	5.75e-07	22	200	1259	42979	OVER	c118576_g1_i1, c134621_g1_i2, c137324_g1_i4, c134583_g6_i1, c110337_g2_i1, c92076_g1_i1, c127228_g2_i1, c28013_g1_i2, c125379_g1_i1, c138369_g1_i3, c135808_g1_i1, c138369_g1_i4, c131838_g1_i1, c130773_g2_i2, c138369_g1_i5, c128741_g1_i1, c127557_g2_i2, c135971_g1_i2, c140198_g4_i2, c138010_g1_i1, c127557_g1_i1, c135971_g1_i1	c93494_g2_i1, c133623_g1_i1, c134471_g2_i1, c110337_g1_i1, c132326_g1_i1, c137222_g1_i2, c48693_g2_i1, c134583_g1_i1, c129776_g1_i7, c129776_g1_i6, c130168_g2_i1, c125487_g2_i1, c175290_g1_i1, c129776_g1_i5, c171038_g1_i1, c129776_g1_i1, c164738_g1_i1, c184675_g1_i1, c134583_g1_i2, c138369_g1_i1, c134112_g1_i1, c134112_g1_i2, c136973_g2_i1, c139082_g1_i3, c139082_g1_i2, c138369_g1_i7, c159015_g1_…
GO:0006004	fucose metabolic process	P	0.00109	6.86e-07	4	0	1277	43179	OVER	c136617_g1_i1, c136617_g1_i3, c138566_g3_i2, c138566_g3_i1
GO:0042546	cell wall biogenesis	P	0.00192	1.45e-06	23	230	1258	42949	OVER	c134621_g1_i2, c137324_g1_i4, c107164_g1_i1, c134583_g6_i1, c110337_g2_i1, c92076_g1_i1, c127228_g2_i1, c210896_g1_i1, c112592_g1_i1, c28013_g1_i2, c138369_g1_i3, c135808_g1_i1, c130621_g2_i2, c138369_g1_i4, c131838_g1_i1, c131218_g2_i1, c130773_g2_i2, c138369_g1_i5, c131218_g2_i2, c130227_g2_i1, c127557_g2_i2, c138010_g1_i1, c127557_g1_i1	c93494_g2_i1, c110337_g1_i1, c95324_g2_i1, c115891_g2_i1, c132326_g1_i1, c137222_g1_i2, c126536_g1_i1, c134583_g1_i1, c129776_g1_i7, c129776_g1_i6, c130168_g2_i1, c125487_g2_i1, c175290_g1_i1, c129776_g1_i5, c138565_g1_i1, c22044_g1_i1, c138565_g1_i2, c171038_g1_i1, c138565_g1_i3, c129776_g1_i1, c184675_g1_i1, c134583_g1_i2, c138369_g1_i1, c134112_g1_i1, c134112_g1_i2, c105494_g1_i1, c139082_g1_i…
GO:0009834	plant-type secondary cell wall biogenesis	P	0.0025	2.34e-06	11	54	1270	43125	OVER	c127228_g2_i1, c135808_g1_i1, c131838_g1_i1, c130773_g2_i2, c137324_g1_i4, c134583_g6_i1, c110337_g2_i1, c127557_g2_i2, c92076_g1_i1, c138010_g1_i1, c127557_g1_i1	c137324_g1_i3, c137324_g1_i2, c93494_g2_i1, c110337_g1_i1, c137324_g1_i5, c70280_g1_i1, c70280_g1_i2, c137802_g1_i1, c135808_g1_i3, c137222_g1_i2, c134583_g1_i1, c185109_g1_i1, c23397_g1_i1, c135808_g1_i2, c130168_g2_i1, c130889_g2_i1, c175290_g1_i1, c100272_g1_i1, c158869_g1_i1, c126788_g1_i4, c126788_g1_i3, c126788_g1_i2, c126788_g1_i1, c98702_g1_i2, c98702_g1_i1, c217766_g1_i1, c134583_g1_i2, …
GO:0009832	plant-type cell wall biogenesis	P	0.0025	2.81e-06	16	123	1265	43056	OVER	c134621_g1_i2, c137324_g1_i4, c134583_g6_i1, c110337_g2_i1, c92076_g1_i1, c127228_g2_i1, c28013_g1_i2, c138369_g1_i3, c135808_g1_i1, c138369_g1_i4, c131838_g1_i1, c130773_g2_i2, c138369_g1_i5, c127557_g2_i2, c138010_g1_i1, c127557_g1_i1	c93494_g2_i1, c154873_g1_i1, c110337_g1_i1, c132326_g1_i1, c135808_g1_i3, c137222_g1_i2, c134583_g1_i1, c129776_g1_i7, c23397_g1_i1, c129776_g1_i6, c135808_g1_i2, c130168_g2_i1, c134615_g2_i2, c125487_g2_i1, c175290_g1_i1, c129776_g1_i5, c126788_g1_i4, c171038_g1_i1, c141611_g2_i1, c126788_g1_i3, c141611_g2_i4, c126788_g1_i2, c126788_g1_i1, c178050_g1_i1, c129776_g1_i1, c217766_g1_i1, c184675_g1_…
GO:0034637	cellular carbohydrate biosynthetic process	P	0.0025	2.99e-06	31	395	1250	42784	OVER	c118576_g1_i1, c140993_g1_i1, c137324_g1_i4, c140993_g1_i4, c135378_g1_i6, c140993_g1_i5, c135378_g1_i5, c140993_g1_i3, c140993_g1_i7, c127228_g2_i1, c125189_g2_i1, c136305_g2_i3, c127557_g1_i1, c131721_g1_i1, c126200_g1_i1, c92076_g1_i1, c117774_g1_i2, c117774_g1_i1, c138369_g1_i3, c138369_g1_i4, c131838_g1_i1, c130773_g2_i2, c138369_g1_i5, c125189_g3_i1, c138566_g3_i2, c128071_g1_i3, c138566_g3…	c120579_g1_i2, c93494_g2_i1, c120579_g1_i1, c165019_g1_i1, c182473_g1_i1, c75110_g1_i1, c130168_g2_i1, c118760_g1_i1, c59449_g1_i1, c170575_g1_i1, c121417_g2_i1, c159015_g1_i1, c210917_g1_i1, c114061_g1_i1, c2783_g1_i1, c188618_g1_i1, c123780_g1_i1, c135029_g2_i1, c181612_g1_i1, c131118_g3_i1, c147374_g1_i1, c137505_g2_i1, c119178_g1_i1, c125103_g1_i2, c136016_g1_i1, c136016_g1_i2, c125103_g1_i1,…
GO:0016051	carbohydrate biosynthetic process	P	0.0025	3.16e-06	38	543	1243	42636	OVER	c118576_g1_i1, c140993_g1_i1, c137324_g1_i4, c140993_g1_i4, c135378_g1_i6, c137847_g1_i1, c140993_g1_i5, c135378_g1_i5, c140993_g1_i3, c140993_g1_i7, c135956_g1_i3, c127228_g2_i1, c210896_g1_i1, c125189_g2_i1, c136305_g2_i3, c127557_g1_i1, c131721_g1_i1, c133042_g2_i4, c143871_g1_i1, c107164_g1_i1, c126200_g1_i1, c92076_g1_i1, c117774_g1_i2, c117774_g1_i1, c138369_g1_i3, c138369_g1_i4, c131838_g1…	c120579_g1_i2, c93494_g2_i1, c120579_g1_i1, c165019_g1_i1, c182473_g1_i1, c75110_g1_i1, c208419_g1_i1, c135956_g1_i1, c130168_g2_i1, c20390_g1_i1, c118760_g1_i1, c59449_g1_i1, c139749_g1_i4, c170575_g1_i1, c113803_g2_i1, c144815_g1_i1, c113803_g2_i2, c94551_g1_i1, c121417_g2_i1, c159015_g1_i1, c210917_g1_i1, c114061_g1_i1, c2783_g1_i1, c188618_g1_i1, c123780_g1_i1, c135029_g2_i1, c181612_g1_i1, c…
GO:0043097	pyrimidine nucleoside salvage	P	0.00312	4.33e-06	8	26	1273	43153	OVER	c121490_g1_i1, c134101_g1_i1, c133514_g1_i6, c133514_g1_i5, c133514_g1_i2, c133514_g1_i1, c133514_g1_i4, c133514_g1_i3	c152895_g1_i1, c113966_g1_i1, c134101_g1_i3, c134101_g1_i2, c140259_g3_i7, c134101_g1_i4, c140259_g3_i1, c134246_g3_i2, c134246_g3_i3, c208419_g1_i1, c134246_g3_i1, c134246_g3_i4, c149475_g1_i1, c124930_g1_i4, c8313_g1_i1, c135845_g1_i4, c135845_g1_i3, c137666_g1_i3, c135845_g1_i2, c137666_g1_i4, c135845_g1_i1, c119116_g1_i1, c162313_g1_i1, c130724_g1_i3, c130724_g1_i2, c106080_g1_i1
GO:0016413	O-acetyltransferase activity	F	0.00343	5.2e-06	12	72	1269	43107	OVER	c75207_g1_i1, c131877_g1_i2, c118576_g1_i1, c101724_g1_i3, c101724_g1_i1, c101724_g1_i2, c136096_g1_i2, c136096_g1_i4, c102095_g1_i1, c6775_g1_i1, c3199_g1_i1, c134379_g2_i1	c197047_g1_i1, c133758_g1_i3, c49378_g1_i1, c138966_g1_i5, c100856_g1_i1, c138966_g1_i6, c215883_g1_i1, c122406_g1_i1, c157424_g1_i1, c134584_g1_i2, c134584_g1_i1, c133497_g1_i3, c138966_g1_i1, c133021_g1_i2, c111651_g1_i1, c138966_g1_i2, c138966_g1_i3, c133497_g1_i1, c133021_g3_i1, c112252_g1_i1, c134379_g2_i6, c55156_g1_i1, c134379_g2_i4, c134379_g2_i5, c168158_g1_i1, c136143_g2_i2, c136143_g2_…
GO:0016020	membrane	C	0.00419	6.88e-06	549	15896	732	27283	OVER	c131675_g1_i1, c126211_g1_i1, c138824_g1_i2, c124711_g1_i1, c130911_g1_i4, c21021_g1_i1, c133459_g2_i2, c141127_g1_i3, c141127_g1_i2, c51166_g1_i1, c132539_g2_i3, c141127_g1_i5, c137416_g1_i3, c137416_g1_i1, c136096_g1_i2, c136096_g1_i4, c136096_g1_i3, c140462_g2_i1, c108999_g1_i1, c134926_g1_i2, c134621_g1_i2, c129145_g1_i1, c132059_g1_i1, c134379_g2_i1, c136889_g1_i1, c132001_g1_i2, c138135_g1_…	c140157_g2_i10, c139489_g2_i3, c137046_g1_i4, c84022_g1_i1, c93805_g1_i1, c137046_g1_i3, c62501_g1_i1, c132992_g1_i1, c101932_g2_i1, c98406_g2_i1, c166280_g1_i1, c117352_g1_i1, c207073_g1_i1, c132992_g1_i2, c132992_g1_i3, c123278_g1_i2, c137500_g2_i1, c123278_g1_i1, c141146_g2_i1, c171956_g1_i1, c111070_g1_i1, c168176_g1_i1, c139326_g1_i2, c139326_g1_i1, c127490_g1_i1, c127490_g1_i2, c134621_g1_i…
27279_g2_i4, c124071_g2_i1, c137487_g3_i6, c127279_g2_i2, c137487_g3_i7, c127279_g2_i1, c137487_g3_i4, c137487_g3_i5, c143885_g1_i1, c130443_g1_i1, c137487_g3_i8, c120241_g1_i1, c137487_g3_i9, c134255_g2_i2, c126244_g1_i2, c126244_g1_i1, c12525_g1_i1, c139502_g1_i4, c140461_g3_i1, c110279_g1_i1, c127840_g1_i2, c104985_g1_i1, c137658_g1_i5, c139118_g1_i1, c137658_g1_i6, c137658_g1_i1, c137658_g1_i…
_g1_i1, c120400_g2_i1, c217898_g1_i1, c133778_g1_i3, c133778_g1_i4, c133778_g1_i1, c133778_g1_i2, c181081_g1_i1, c186029_g1_i1, c168698_g1_i1, c91241_g1_i1, c127202_g2_i1, c81072_g1_i1, c63516_g1_i1, c213602_g1_i1, c169135_g1_i1, c125081_g1_i2, c125081_g1_i1, c30065_g1_i1, c137435_g1_i4, c125081_g1_i4, c137435_g1_i3, c125081_g1_i3, c137435_g1_i2, c137435_g1_i1, c185056_g1_i1, c136332_g3_i3, c1363…
2_g1_i1, c180235_g1_i1, c140823_g1_i2, c140823_g1_i3, c140823_g1_i1, c150003_g1_i1, c135949_g1_i1, c122059_g1_i1, c188788_g1_i1, c131023_g1_i1, c133466_g2_i3, c133466_g2_i2, c123725_g2_i1, c87177_g1_i1, c102526_g1_i1, c129393_g1_i1, c2361_g1_i1, c77214_g1_i1, c155638_g1_i1, c75644_g1_i1, c155730_g1_i1, c137410_g2_i1, c125189_g1_i1, c167855_g1_i1, c99100_g1_i1, c133343_g1_i2, c133343_g1_i1, c11111…
_i2, c151696_g1_i1, c187159_g1_i1, c100572_g1_i1, c138095_g3_i2, c138095_g3_i1, c124746_g5_i1, c144751_g1_i1, c76439_g1_i1, c76439_g1_i2, c135037_g1_i6, c135037_g1_i4, c133898_g1_i1, c137038_g1_i2, c135037_g1_i3, c28445_g1_i1, c28445_g1_i2, c133898_g1_i7, c133898_g1_i6, c133898_g1_i3, c133898_g1_i2, c133898_g1_i5, c133898_g1_i4, c133478_g2_i1, c129170_g3_i1, c137633_g1_i2, c137633_g1_i1, c134508_…
51_g1_i1, c180449_g1_i1, c118482_g1_i1, c78510_g1_i1, c104176_g1_i2, c132180_g1_i2, c132180_g1_i1, c132180_g1_i6, c136481_g2_i1, c101451_g1_i2, c125831_g1_i1, c124080_g1_i2, c125831_g1_i2, c124080_g1_i1, c39908_g1_i1, c139971_g1_i1, c124080_g1_i4, c124080_g1_i3, c49471_g1_i1, c155837_g1_i1, c1873_g1_i1, c136248_g2_i1, c1873_g1_i2, c136248_g2_i4, c120805_g2_i1, c20970_g1_i1, c219783_g1_i1, c212093…
7625_g1_i1, c108738_g1_i1, c141675_g1_i1, c108738_g1_i2, c101179_g2_i1, c154873_g1_i1, c193982_g1_i1, c129375_g2_i1, c201899_g1_i1, c139180_g3_i1, c109816_g1_i1, c130460_g1_i1, c141235_g1_i1, c171289_g1_i1, c141235_g1_i4, c134671_g1_i1, c141235_g1_i5, c133497_g1_i3, c141235_g1_i2, c141235_g1_i3, c136722_g1_i1, c213437_g1_i1, c141235_g1_i6, c133497_g1_i1, c141697_g2_i2, c141235_g1_i7, c132537_g1_i…
1, c136231_g1_i4, c136231_g1_i5, c139709_g1_i4, c137716_g1_i3, c137716_g1_i4, c137716_g1_i5, c129215_g1_i1, c197667_g1_i1, c139709_g1_i1, c139709_g1_i2, c103439_g1_i1, c139082_g1_i3, c141300_g4_i1, c139082_g1_i2, c139082_g1_i5, c103439_g1_i2, c164091_g1_i1, c125384_g2_i1, c174162_g1_i1, c138269_g2_i2, c110128_g2_i1, c202169_g1_i1, c136016_g1_i1, c136016_g1_i2, c136016_g1_i3, c134784_g1_i1, c13478…
GO:0004849	uridine kinase activity	F	0.0045	8.53e-06	8	29	1273	43150	OVER	c121490_g1_i1, c134101_g1_i1, c133514_g1_i6, c133514_g1_i5, c133514_g1_i2, c133514_g1_i1, c133514_g1_i4, c133514_g1_i3	c152895_g1_i1, c113966_g1_i1, c140259_g3_i5, c134101_g1_i3, c134101_g1_i2, c140259_g3_i7, c140259_g3_i2, c134101_g1_i4, c140259_g3_i1, c140259_g3_i3, c134246_g3_i2, c134246_g3_i3, c208419_g1_i1, c134246_g3_i1, c134246_g3_i4, c149475_g1_i1, c124930_g1_i4, c8313_g1_i1, c135845_g1_i4, c135845_g1_i3, c137666_g1_i3, c135845_g1_i2, c137666_g1_i4, c135845_g1_i1, c119116_g1_i1, c162313_g1_i1, c130724_g1_…
GO:0043174	nucleoside salvage	P	0.0045	8.53e-06	8	29	1273	43150	OVER	c121490_g1_i1, c134101_g1_i1, c133514_g1_i6, c133514_g1_i5, c133514_g1_i2, c133514_g1_i1, c133514_g1_i4, c133514_g1_i3	c152895_g1_i1, c130908_g1_i1, c113966_g1_i1, c134101_g1_i3, c134101_g1_i2, c140259_g3_i7, c134101_g1_i4, c140259_g3_i1, c140012_g2_i1, c134246_g3_i2, c134246_g3_i3, c208419_g1_i1, c134246_g3_i1, c134246_g3_i4, c149475_g1_i1, c124930_g1_i4, c8313_g1_i1, c135845_g1_i4, c135845_g1_i3, c137666_g1_i3, c135845_g1_i2, c137666_g1_i4, c135845_g1_i1, c140012_g3_i1, c119116_g1_i1, c162313_g1_i1, c130724_g1_…
GO:0009664	plant-type cell wall organization	P	0.0057	1.15e-05	15	123	1266	43056	OVER	c118576_g1_i1, c134621_g1_i2, c134583_g6_i1, c110337_g2_i1, c28013_g1_i2, c125379_g1_i1, c138369_g1_i3, c138369_g1_i4, c131838_g1_i1, c138369_g1_i5, c128741_g1_i1, c135971_g1_i2, c140198_g4_i2, c138010_g1_i1, c135971_g1_i1	c124558_g1_i1, c133623_g1_i1, c154873_g1_i1, c134471_g2_i1, c110337_g1_i1, c132326_g1_i1, c137222_g1_i2, c48693_g2_i1, c134583_g1_i1, c134615_g2_i2, c32333_g2_i1, c115957_g2_i1, c141611_g2_i1, c141611_g2_i4, c113932_g1_i1, c178050_g1_i1, c125276_g1_i1, c137862_g3_i1, c164738_g1_i1, c184675_g1_i1, c134583_g1_i2, c91784_g1_i1, c213301_g1_i1, c138369_g1_i1, c134112_g1_i1, c134112_g1_i2, c136973_g2_i…
GO:0044723	single-organism carbohydrate metabolic process	P	0.00583	1.25e-05	59	1077	1222	42102	OVER	c140993_g1_i1, c137324_g1_i4, c140993_g1_i4, c140993_g1_i5, c132857_g1_i1, c140993_g1_i3, c140993_g1_i7, c136755_g1_i2, c135956_g1_i3, c136755_g1_i1, c210896_g1_i1, c136617_g1_i1, c136617_g1_i3, c125189_g2_i1, c136305_g2_i3, c125614_g3_i2, c131721_g1_i1, c133042_g2_i4, c143871_g1_i1, c138016_g1_i1, c138016_g1_i2, c134766_g1_i1, c128801_g1_i2, c92076_g1_i1, c138016_g1_i5, c138369_g1_i3, c138369_g1…	c120579_g1_i2, c93494_g2_i1, c120579_g1_i1, c75110_g1_i1, c128166_g2_i1, c208419_g1_i1, c130991_g1_i1, c20390_g1_i1, c138044_g1_i1, c153540_g1_i1, c136850_g1_i2, c118760_g1_i1, c138044_g1_i4, c59449_g1_i1, c138044_g1_i5, c138044_g1_i3, c132756_g1_i1, c139749_g1_i4, c128954_g1_i2, c137215_g1_i1, c137215_g1_i2, c135983_g1_i3, c135983_g1_i4, c140274_g2_i1, c135983_g1_i5, c144815_g1_i1, c140274_g2_i2…
GO:0005768	endosome	C	0.00668	1.52e-05	30	410	1251	42769	OVER	c128883_g1_i3, c130052_g1_i2, c139180_g1_i4, c140719_g1_i6, c139180_g1_i3, c133466_g2_i1, c96851_g1_i1, c141007_g1_i1, c140098_g1_i2, c139231_g1_i5, c141178_g2_i2, c136028_g1_i2, c131083_g3_i2, c141178_g4_i2, c136028_g1_i1, c133042_g2_i4, c128414_g2_i1, c128414_g2_i2, c138369_g1_i3, c138369_g1_i4, c138426_g1_i6, c130773_g2_i2, c138369_g1_i5, c138426_g1_i3, c138566_g3_i2, c138426_g1_i2, c138566_g3…	c139489_g2_i3, c12532_g1_i1, c93494_g2_i1, c130107_g3_i2, c141376_g1_i1, c133057_g1_i1, c141376_g1_i2, c141224_g2_i1, c130267_g1_i1, c141251_g2_i5, c106452_g1_i1, c118224_g1_i1, c195015_g1_i1, c172705_g1_i1, c134771_g1_i2, c137129_g1_i6, c137129_g1_i5, c137129_g1_i8, c137129_g1_i7, c129874_g1_i1, c137129_g1_i2, c137129_g1_i1, c137129_g1_i4, c137129_g1_i3, c138869_g1_i2, c138869_g1_i1, c138869_g1_…
GO:0071555	cell wall organization	P	0.00897	2.15e-05	34	505	1247	42674	OVER	c121974_g1_i1, c121974_g3_i1, c118576_g1_i1, c137324_g1_i4, c129834_g1_i2, c129834_g1_i1, c127228_g2_i1, c112592_g1_i1, c125379_g1_i1, c130621_g2_i2, c125189_g2_i1, c128741_g1_i1, c136259_g1_i1, c136259_g1_i2, c135971_g1_i2, c127557_g1_i1, c135971_g1_i1, c131721_g1_i1, c134621_g1_i2, c133042_g2_i4, c134583_g6_i1, c130920_g1_i1, c110337_g2_i1, c28013_g1_i2, c138369_g1_i3, c138369_g1_i4, c131838_g1…	c133175_g1_i5, c133623_g1_i1, c133175_g1_i4, c134471_g2_i1, c110337_g1_i1, c133175_g1_i7, c133175_g1_i6, c166280_g1_i1, c135195_g2_i1, c134583_g1_i1, c138591_g2_i4, c138591_g2_i3, c138591_g2_i2, c20390_g1_i1, c59449_g1_i1, c136919_g1_i3, c134184_g2_i6, c186143_g1_i1, c144815_g1_i1, c122208_g1_i1, c135691_g1_i3, c135691_g1_i2, c135691_g1_i1, c184675_g1_i1, c134583_g1_i2, c134112_g1_i1, c134112_g1_…
GO-ID	Term	Category	FDR	P-Value	#Test	#Ref	#notAnnotTest	#notAnnotRef	Over/Under	TestSeqs	RefSeqs
Male
GO:0008732	L-allo-threonine aldolase activity	F	1.12e-09	2.82e-13	10	1	1947	42502	OVER	c139702_g1_i1, c139702_g2_i1, c139702_g2_i4, c139702_g1_i3, c139702_g2_i3, c139702_g1_i2, c139702_g2_i6, c139702_g1_i5, c139702_g2_i5, c139702_g1_i4	c139702_g2_i2
GO:0004793	threonine aldolase activity	F	1.12e-09	2.82e-13	10	1	1947	42502	OVER	c139702_g1_i1, c139702_g2_i1, c139702_g2_i4, c139702_g1_i3, c139702_g2_i3, c139702_g1_i2, c139702_g2_i6, c139702_g1_i5, c139702_g2_i5, c139702_g1_i4	c139702_g2_i2
GO:0009068	aspartate family amino acid catabolic process	P	1.34e-08	6.76e-12	10	3	1947	42500	OVER	c139702_g1_i1, c139702_g2_i1, c139702_g2_i4, c139702_g1_i3, c139702_g2_i3, c139702_g1_i2, c139702_g2_i6, c139702_g1_i5, c139702_g2_i5, c139702_g1_i4	c94438_g1_i1, c101033_g1_i1, c139702_g2_i2
GO:0006567	threonine catabolic process	P	1.34e-08	6.76e-12	10	3	1947	42500	OVER	c139702_g1_i1, c139702_g2_i1, c139702_g2_i4, c139702_g1_i3, c139702_g2_i3, c139702_g1_i2, c139702_g2_i6, c139702_g1_i5, c139702_g2_i5, c139702_g1_i4	c94438_g1_i1, c101033_g1_i1, c139702_g2_i2
GO:0006545	glycine biosynthetic process	P	3.6e-08	2.27e-11	10	4	1947	42499	OVER	c139702_g1_i1, c139702_g2_i1, c139702_g2_i4, c139702_g1_i3, c139702_g2_i3, c139702_g1_i2, c139702_g2_i6, c139702_g1_i5, c139702_g2_i5, c139702_g1_i4	c133698_g2_i1, c139702_g2_i2, c205149_g1_i1, c182140_g1_i1
GO:0008470	isovaleryl-CoA dehydrogenase activity	F	9.54e-06	7.22e-09	6	0	1951	42503	OVER	c135660_g3_i3, c135660_g3_i4, c135660_g3_i1, c135660_g3_i2, c135660_g3_i5, c135660_g3_i6
GO:0006566	threonine metabolic process	P	1.2e-05	1.06e-08	10	12	1947	42491	OVER	c139702_g1_i1, c139702_g2_i1, c139702_g2_i4, c139702_g1_i3, c139702_g2_i3, c139702_g1_i2, c139702_g2_i6, c139702_g1_i5, c139702_g2_i5, c139702_g1_i4	c22457_g1_i1, c94438_g1_i1, c216467_g1_i1, c134933_g1_i1, c194400_g1_i1, c101033_g1_i1, c119316_g2_i1, c119316_g2_i2, c119316_g1_i1, c139702_g2_i2, c114771_g1_i1, c114771_g1_i2
GO:0060776	simple leaf morphogenesis	P	8.86e-05	8.94e-08	7	4	1950	42499	OVER	c136345_g1_i2, c136345_g1_i1, c136345_g1_i6, c136345_g1_i7, c136345_g1_i5, c134885_g3_i1, c139107_g1_i1	c136345_g1_i3, c139107_g1_i4, c134885_g3_i2, c139107_g1_i3
GO:0009083	branched-chain amino acid catabolic process	P	0.000165	1.87e-07	6	2	1951	42501	OVER	c135660_g3_i3, c135660_g3_i4, c135660_g3_i1, c135660_g3_i2, c135660_g3_i5, c135660_g3_i6	c106634_g1_i2, c106634_g1_i1
GO:0006552	leucine catabolic process	P	0.00134	1.69e-06	8	13	1949	42490	OVER	c139140_g2_i2, c139140_g2_i1, c135660_g3_i4, c135660_g3_i1, c135660_g3_i2, c135660_g3_i5, c136218_g1_i1, c135660_g3_i6	c136218_g1_i4, c136218_g1_i3, c136218_g2_i1, c123065_g1_i1, c123065_g1_i2, c136218_g1_i2, c136218_g2_i2, c138201_g1_i2, c138201_g1_i1, c139140_g2_i3, c163301_g1_i1, c138201_g1_i3, c123065_g1_i3
GO:0006167	AMP biosynthetic process	P	0.00141	2.55e-06	7	9	1950	42494	OVER	c141559_g2_i1, c109908_g1_i1, c141559_g2_i5, c141559_g2_i4, c141559_g2_i3, c141559_g2_i8, c141559_g2_i7	c109908_g1_i2, c1027_g1_i1, c136680_g1_i3, c136680_g1_i2, c8885_g1_i1, c141559_g2_i6, c136680_g1_i1, c140012_g3_i1, c140012_g2_i1
GO:0046033	AMP metabolic process	P	0.00141	2.55e-06	7	9	1950	42494	OVER	c141559_g2_i1, c109908_g1_i1, c141559_g2_i5, c141559_g2_i4, c141559_g2_i3, c141559_g2_i8, c141559_g2_i7	c109908_g1_i2, c1027_g1_i1, c136680_g1_i3, c136680_g1_i2, c8885_g1_i1, c141559_g2_i6, c136680_g1_i1, c140012_g3_i1, c140012_g2_i1
GO:0035064	methylated histone binding	F	0.00141	2.75e-06	6	5	1951	42498	OVER	c139086_g2_i7, c139086_g2_i6, c133477_g2_i1, c133477_g2_i5, c133477_g2_i3, c133477_g2_i2	c139086_g2_i3, c139086_g2_i2, c139086_g2_i5, c139086_g2_i4, c139086_g2_i10
GO:0004019	adenylosuccinate synthase activity	F	0.00141	2.75e-06	6	5	1951	42498	OVER	c141559_g2_i1, c141559_g2_i5, c141559_g2_i4, c141559_g2_i3, c141559_g2_i8, c141559_g2_i7	c136680_g1_i3, c136680_g1_i2, c8885_g1_i1, c141559_g2_i6, c136680_g1_i1
GO:0070545	PeBoW complex	C	0.00141	2.75e-06	6	5	1951	42498	OVER	c141559_g2_i1, c141559_g2_i5, c141559_g2_i4, c141559_g2_i3, c141559_g2_i8, c141559_g2_i7	c5935_g1_i2, c153177_g1_i1, c127704_g1_i1, c214512_g1_i1, c141559_g2_i6
GO:0009063	cellular amino acid catabolic process	P	0.00141	2.85e-06	20	118	1937	42385	OVER	c139140_g2_i2, c139140_g2_i1, c135660_g3_i5, c136218_g1_i1, c135660_g3_i6, c135660_g3_i4, c135660_g3_i1, c135660_g3_i2, c139702_g1_i1, c122846_g1_i5, c139702_g2_i1, c122846_g1_i6, c139702_g2_i4, c139702_g1_i3, c139702_g2_i3, c139702_g1_i2, c139702_g2_i6, c139702_g1_i5, c139702_g2_i5, c139702_g1_i4	c102189_g1_i1, c120027_g2_i1, c207436_g1_i1, c135566_g1_i1, c10161_g1_i1, c92096_g2_i1, c187566_g1_i1, c161188_g1_i1, c179853_g1_i1, c122003_g1_i1, c99888_g1_i1, c103222_g1_i1, c2268_g1_i1, c140372_g2_i1, c140372_g2_i2, c140372_g2_i3, c140372_g2_i5, c140372_g2_i6, c140372_g2_i7, c140372_g2_i8, c140372_g2_i9, c135130_g1_i1, c140372_g2_i10, c140372_g2_i11, c140372_g2_i12, c99045_g1_i1, c130996_g2_i…
GO:0004610	phosphoacetylglucosamine mutase activity	F	0.00174	3.74e-06	4	0	1953	42503	OVER	c131250_g1_i3, c131250_g1_i2, c131250_g1_i4, c131250_g1_i1
GO:0044208	'de novo' AMP biosynthetic process	P	0.00233	5.3e-06	6	6	1951	42497	OVER	c141559_g2_i1, c141559_g2_i5, c141559_g2_i4, c141559_g2_i3, c141559_g2_i8, c141559_g2_i7	c1027_g1_i1, c136680_g1_i3, c136680_g1_i2, c8885_g1_i1, c141559_g2_i6, c136680_g1_i1
GO:0006551	leucine metabolic process	P	0.0032	7.67e-06	8	17	1949	42486	OVER	c139140_g2_i2, c139140_g2_i1, c135660_g3_i4, c135660_g3_i1, c135660_g3_i2, c135660_g3_i5, c136218_g1_i1, c135660_g3_i6	c136218_g1_i4, c136218_g1_i3, c136218_g2_i1, c123065_g1_i1, c123065_g1_i2, c3512_g1_i1, c136218_g1_i2, c136218_g2_i2, c138201_g1_i2, c138201_g1_i1, c139140_g2_i3, c109094_g1_i1, c163301_g1_i1, c138201_g1_i3, c123065_g1_i3, c214252_g1_i1, c1071_g1_i1
GO:0016767	geranylgeranyl-diphosphate geranylgeranyltransferase activity	F	0.00326	8.23e-06	5	3	1952	42500	OVER	c135002_g1_i5, c135002_g1_i6, c135002_g1_i7, c135002_g1_i1, c135002_g1_i4	c135002_g1_i8, c135002_g1_i2, c135002_g1_i3
GO:0032783	ELL-EAF complex	C	0.00681	1.81e-05	4	1	1953	42502	OVER	c123836_g1_i3, c123836_g1_i4, c123836_g1_i1, c123836_g1_i2	c214046_g1_i1
GO:2000232	regulation of rRNA processing	P	0.00923	2.56e-05	6	9	1951	42494	OVER	c141559_g2_i1, c141559_g2_i5, c141559_g2_i4, c141559_g2_i3, c141559_g2_i8, c141559_g2_i7	c5935_g1_i2, c140452_g3_i1, c140452_g3_i4, c140452_g1_i1, c140452_g3_i5, c140452_g3_i2, c140452_g3_i3, c140452_g3_i6, c141559_g2_i6
