# Supplementary material for: Towards sex identification of Asian Palmyra palm (Borassus flabellifer L.) by DNA fingerprinting, suppression subtractive hybridization and de novo transcriptome sequencing
Source: PeerJ. 2019 Jul 10;7:e7268. doi: 10.7717/peerj.7268 (PMC6626516; doi:10.7717/peerj.7268)
Supplement: Table S15 — Sequence identities are presented with percentage of identical matches and alignment length, and FPKM of transcripts from each transcriptome datasets are shown. [file peerj-07-7268-s019.xlsx]

## Sheet: Sheet1
Table S15. Comparison between SSH clones and coresponding transcripts from transcriptome sequencing data.
SSH clones	Transcript IDs	Percentage of identical matches	Alignment length	Number of mismatches	Number of gap openings	Start of alignment in query	End of alignment in query	Start of alignment in subject	End of alignment in subject	Expect value	bit score	FO	FY	MO	MY
F1000	c140785_g5_i3	96.2	710	1	1	119	828	770	87	0	1138	21.77	14.44	15.73	20.79
F1007	c133075_g1_i1	99.69	981	2	1	17	997	16	995	0	1794	22.25	5.08	46.24	5.76
F1023	c92324_g1_i1	92.1	899	69	2	24	921	1073	176	0	1266	75.01	74.61	94.79	44.64
F1039	c133075_g1_i1	99.18	980	7	1	6	985	999	21	0	1764	22.25	5.08	46.24	5.76
F108	c133075_g1_i1	100	415	0	0	6	420	1219	1633	0	767	22.25	5.08	46.24	5.76
F1094	c130620_g1_i1	97.28	1102	24	6	27	1126	1346	249	0	1864	51.75	42.71	55.98	77.19
F119	c123797_g1_i1	100	575	0	0	7	581	115	689	0	1062	234.3	189	130.08	130.58
F13	c7473_g1_i1	99.09	548	5	0	11	558	2805	2258	0	985	26.67	20.43	36.4	14.78
F141	c118009_g1_i1	99.53	644	2	1	6	648	1	644	0	1171	12.9	11.06	15.81	6.46
F152	c93699_g1_i1	99.79	942	2	0	7	948	1353	412	0	1729	300.15	301.06	7.26	0.1
F158	c135563_g1_i1	98.69	842	8	3	402	1241	1152	312	0	1491	0	0	0	0.07
F1598	c134818_g1_i3	99.57	466	2	0	6	471	430	895	0	850	31.47	32.32	36.72	25.87
F1625	c141075_g5_i4	99.6	993	3	1	7	999	87	1078	0	1810	80.08	76.8	105.69	103.89
F163	c133075_g1_i1	99.77	433	1	0	1	433	1633	1201	0	795	22.25	5.08	46.24	5.76
F1638	c985_g1_i1	99.17	721	2	1	26	742	721	1	0	1295	68.58	70.12	56.05	70.14
F172	c136064_g1_i1	99.64	561	1	1	8	567	7	567	0	1024	114.53	97.65	104.14	71.94
F1951	c134763_g1_i1	99.84	620	0	1	26	645	619	1	0	1138	1.35	2.27	2.27	3.33
F196	c127759_g2_i2	98.78	572	0	1	30	601	702	138	0	1011	44.77	34.96	55.45	42.57
F197	c139326_g1_i1	97.3	963	12	5	22	974	1153	195	0	1622	26.72	82.03	68.35	50.9
F198	c139448_g3_i2	99.8	489	1	0	17	505	117	605	0	898	1096.55	1136.47	1194.49	1574.57
F205	c118009_g1_i1	88.46	615	71	0	28	642	23	637	0	743	12.9	11.06	15.81	6.46
F215	c167980_g1_i1	99.58	474	2	0	27	500	1033	560	0	865	65.72	48.35	75.15	88.91
F2252	c137590_g1_i1	99.77	431	1	0	6	436	1107	1537	0	791	306.46	393.93	275.48	309.07
F3360	c126227_g1_i1	100	579	0	0	7	585	3	581	0	1070	5735.59	5714.91	17414.7	579.87
F356	c113269_g2_i1	99.14	347	2	1	167	512	1	347	1e-177	623	44.66	25.34	20.2	31.47
F489	c102985_g1_i1	96.29	1186	41	3	48	1232	18	1201	0	1943	93.79	97.16	79.8	91.73
F507	c136199_g1_i1	98.77	897	6	5	13	909	49	940	0	1591	85.9	81.79	157.65	112.84
F616	c135563_g1_i1	99.25	1060	4	4	6	1065	1370	315	0	1910	0	0	0	0.07
F641	c93020_g1_i1	99.58	952	2	2	21	972	1170	221	0	1735	77.39	65.3	67.4	62.64
F698	c135679_g2_i1	99.66	891	3	0	19	909	2597	1707	0	1629	4.33	4.28	2.64	3.57
F7	c98924_g1_i1	99.76	835	0	2	6	839	1131	1964	0	1530	17.85	17.76	16.73	26.16
F721	c133075_g1_i1	99.8	993	1	1	6	997	661	1653	0	1821	22.25	5.08	46.24	5.76
F722	c135563_g1_i1	99.83	587	1	0	6	592	900	314	0	1079	0	0	0	0.07
F723	c133075_g1_i1	100	861	0	0	7	867	876	16	0	1591	22.25	5.08	46.24	5.76
F777	c102213_g1_i2	100	781	0	0	7	787	56	836	0	1443	37.33	33.71	44.83	28.21
F793	c131547_g1_i1	99.82	544	1	0	242	785	556	13	0	1000	1.5	0.13	1.42	0.58
F802	c119186_g1_i1	99.7	669	2	0	7	675	74	742	0	1225	173.94	161.44	249.91	22.94
F828	c141381_g1_i1	99.7	336	1	0	6	341	2301	2636	4e-175	616	19.44	76.09	29.18	46.42
F830	c139671_g3_i6	94.26	1045	49	11	48	1091	24	1058	0	1587	7.48	12.72	11.24	4.86
F831	c133075_g1_i1	100	721	0	0	6	726	158	878	0	1332	22.25	5.08	46.24	5.76
F996	c131282_g4_i1	100	665	0	0	28	692	665	1	0	1229	627.64	571.52	514.74	306.56
M1042	c108338_g1_i1	100	725	0	0	6	730	59	783	0	1339	146.06	109.66	142.09	157.85
M106	c167810_g1_i1	99.68	313	1	0	6	318	823	1135	9e-163	573	429.3	370.87	1171.9	108.23
M1062	c136616_g1_i1	96.39	1053	26	12	157	1208	337	1378	0	1724	110.67	102.61	70.41	70.23
M1073	c129150_g1_i1	97.34	752	20	0	9	760	163	914	0	1279	48.01	43.13	38.07	77.68
M108	c125172_g1_i1	99.7	984	1	2	6	989	210	1191	0	1799	278.91	255.1	173.35	292.66
M1100	c40203_g1_i1	99.71	694	2	0	30	723	741	48	0	1271	47.59	139.96	83.72	103.91
M111	c139219_g1_i4	90.75	1005	71	22	31	1014	1738	735	0	1321	108.88	86.76	69.39	118.82
M1151	c102052_g1_i1	99.7	663	2	0	1	663	1130	1792	0	1214	13.77	12.25	9.38	4.88
M1164	c102590_g1_i1	99.44	356	2	0	7	362	198	553	0	647	170.32	126.67	94.32	139.97
M1172	c126377_g2_i3	100	658	0	0	9	666	24	681	0	1216	1604.36	1646.36	1880.57	1765.78
M121	c133375_g3_i1	99.76	418	1	0	26	443	860	443	0	767	132.51	89.16	238.47	158.22
M13	c193908_g1_i1	99.69	319	1	0	27	345	319	1	9e-166	584	294.58	408.7	285.92	301.38
M1308	c140688_g2_i3	99.74	379	1	0	6	384	721	1099	0	695	70.82	86.74	76.46	97.64
M149	c77161_g1_i1	97.05	780	12	11	373	1152	1	769	0	1303	61.48	29.25	3.63	0
M1627	c108041_g1_i2	99.62	525	2	0	6	530	227	751	0	959	406.02	442.11	444.44	206.63
M1638	c137289_g1_i1	98.07	517	10	0	23	539	517	1	0	900	1709.37	1477.26	1933.05	1568.93
M168	c139096_g1_i11	99.88	804	0	1	35	838	2569	1767	0	1478	1.09	1.05	0.89	1.3
M174	c105037_g1_i1	98.2	947	8	9	30	976	1226	289	0	1646	133.32	65.89	141.6	177.6
M191	c134042_g1_i1	100	805	0	0	7	811	111	915	0	1487	474.61	480.59	376.57	284.15
M204	c138261_g9_i4	99.64	549	2	0	6	554	4	552	0	1003	5054.67	4475.03	5420.72	7506.57
M232	c107507_g1_i1	97.41	1237	23	9	6	1238	80	1311	0	2098	51.71	45.86	60.06	80.75
M245	c137627_g2_i1	100	632	0	0	28	659	2448	1817	0	1168	19.35	23.64	18.22	24.65
M271	c117987_g1_i2	99.85	656	1	0	6	661	702	1357	0	1206	11.17	9.16	12.88	22.69
M2881	c114788_g1_i1	99.71	695	1	1	5	698	182	876	0	1271	264.25	281.78	177.34	181.97
M2882	c141336_g7_i4	99.67	906	3	0	33	938	926	21	0	1657	260.68	589.06	550.13	457.95
M296	c136705_g1_i1	97.82	596	11	1	7	602	37	630	0	1027	231.77	1483.04	380.06	1376.55
M312	c15589_g1_i1	99.2	373	3	0	243	615	1197	825	0	673	43.39	50.67	42.74	48.38
M316	c10732_g1_i2	99.7	1002	0	3	44	1045	1	999	0	1831	11.68	6.87	14.53	14.48
M319	c128103_g3_i1	99.83	600	1	0	56	655	1	600	0	1103	96.08	80.12	55.05	70.66
M322	c126360_g1_i3	100	674	0	0	30	703	860	187	0	1245	78.9	55.22	155.27	48.02
M340	c135260_g1_i1	100	818	0	0	46	863	349	1166	0	1511	432.78	371.17	393.62	272.97
M343	c108416_g1_i1	99	500	3	1	31	528	821	322	0	894	81.53	70.39	85.65	70.07
M373	c127858_g1_i1	98.87	883	10	0	34	916	2522	1640	0	1576	30.64	30.47	26.94	33.79
M377	c116418_g1_i2	99.7	663	1	1	11	673	689	28	0	1212	0	0	0	0
M390	c102103_g1_i1	100	608	0	0	6	613	394	1001	0	1123	351.08	478.09	237.62	355.2
M475	c118009_g1_i1	99.54	649	2	1	8	656	648	1	0	1181	12.9	11.06	15.81	6.46
M502	c77218_g1_i1	98.84	518	0	5	6	522	24	536	0	918	675.01	296.56	997.69	217.84
M507	c115149_g1_i1	100	698	0	0	6	703	700	3	0	1290	0	0	0	0
M520	c138674_g1_i4	95.37	799	35	2	7	805	797	1	0	1269	0.39	4.45	2.47	2.48
M563	c139118_g3_i1	99.29	1130	7	1	7	1136	140	1268	0	2041	30.25	39.58	40.35	62.93
M599	c1806_g1_i1	96.72	884	22	7	29	911	908	31	0	1465	71.4	65.65	73.08	69.4
M605	c139862_g2_i1	91.76	376	30	1	116	490	915	540	5e-147	521	87.97	84.98	70.36	58.64
M606	c138718_g5_i1	100	839	0	0	6	844	1226	2064	0	1550	5.64	8.29	4.06	9.12
M63	c130114_g1_i2	100	640	0	0	6	645	501	1140	0	1182	15.3	94.6	30.87	56.91
M633	c126377_g2_i3	99.42	684	4	0	9	692	24	707	0	1242	1604.36	1646.36	1880.57	1765.78
M64	c141577_g1_i5	99.35	465	3	0	6	470	2012	2476	0	843	21.79	17.82	40.41	56.01
M65	c108531_g1_i1	83.93	672	69	23	54	697	854	194	2e-172	606	113.15	106.54	101.81	118.43
M67	c126976_g1_i1	100	454	0	0	5	458	53	506	0	839	296.24	314.32	237.02	279.83
M703	c102052_g1_i1	94.34	1289	49	23	6	1292	10	1276	0	1954	13.77	12.25	9.38	4.88
M746	c125468_g1_i1	100	757	0	0	6	762	492	1248	0	1399	3.25	4.54	1.83	3.76
M750	c103544_g1_i1	100	850	0	0	27	876	1598	749	0	1570	7.79	8.51	10.95	11.55
M76	c127865_g1_i1	99.51	611	3	0	23	633	1803	1193	0	1112	132.16	116.05	103.09	140.05
M78	c137169_g1_i1	91.32	783	64	4	146	927	897	118	0	1066	400.76	377.64	366.51	383.24
M79	c132402_g1_i1	99.24	918	5	2	5	922	254	1169	0	1655	108.81	105.21	96.27	124.14
M791	c128062_g1_i1	97.79	952	17	4	6	957	147	1094	0	1639	60.8	68.64	55.26	98.09
M80	c2812_g1_i1	90.13	557	50	3	5	558	897	343	0	719	0	0	0	0
M87	c118518_g1_i1	99.67	304	1	0	290	593	394	91	2e-157	556	28.37	41.24	20.35	22.39
M88	c117873_g1_i1	93.29	596	36	3	32	624	616	22	0	876	1.62	0.98	0.73	2.2
M91	c140767_g4_i1	87.16	872	83	18	5	862	536	1392	0	963	761.63	489.19	1508.91	328.47
M97	c196425_g1_i1	99.72	360	1	0	221	580	372	13	0	660	0	0	0	0.53
